# 1 Quiescence-inducing 3D-engineered matrix uncovers 2 mechanosensitive and drug protective FHL2-p21 signaling axis

3  
4 Sadra Bakhshandeh<sup>1</sup>, Hubert M. Taïeb<sup>1</sup>, Adithi R. Varadarajan<sup>2</sup>, Susanna M. Lissek<sup>3</sup>, Sarah M.  
5 Hücker<sup>2</sup>, Xin Lu<sup>2</sup>, Daniela S. Garske<sup>1</sup>, Sarah A. E. Young<sup>1</sup>, Jörg Contzen<sup>4, 5, 6</sup>, Manfred Gossen<sup>5, 6</sup>,  
6 Stefan Kirsch<sup>2</sup>, Jens Warfsmann<sup>2</sup>, Kamran Honarnejad<sup>2</sup>, Christoph A. Klein<sup>2, 3</sup>, Amaia Cipitria<sup>1, 7,</sup>  
7 8\*

9 <sup>1</sup>Department of Biomaterials, Max Planck Institute of Colloids and Interfaces, Potsdam, Germany

10 <sup>2</sup>Division of Personalized Tumor Therapy, Fraunhofer Institute for Toxicology and Experimental  
11 Medicine, Regensburg, Germany

12 <sup>3</sup>Experimental Medicine and Therapy Research, University of Regensburg, Regensburg, Germany

13 <sup>4</sup>Department of Experimental Neurology, Charité - Universitätsmedizin Berlin, Berlin, Germany

14 <sup>5</sup>Institute of Active Polymers, Helmholtz-Zentrum Hereon, Teltow, Germany

15 <sup>6</sup>Berlin-Brandenburg Center for Regenerative Therapies, Charité Campus Virchow Klinikum,  
16 Berlin, Germany

17 <sup>7</sup> Group of Bioengineering in Regeneration and Cancer, Biodonostia Health Research Institute,  
18 San Sebastian, Spain

19 <sup>8</sup>IKERBASQUE, Basque Foundation for Science, Bilbao, Spain

20  
21  
22 Correspondence to: [amaia.cipitria@mpikg.mpg.de](mailto:amaia.cipitria@mpikg.mpg.de)

## 23 24 25 26 **Abstract**

27 Resected tumors frequently relapse with distant metastasis, despite systemic treatment. Cellular  
28 quiescence has been identified as an important mechanism underlying such drug resistance enabling  
29 late relapse. Nonetheless, hurdles associated with detection and isolation of disseminated cancer  
30 cells (DCCs) in disease-free patients urge the need for *in vitro* models of quiescent cells suited for  
31 drug screening campaigns. Here, we explore a quiescence-inducing 3D-engineered matrix based on  
32 ultraviolet light-initiated thiol-ene-crosslinked alginate hydrogels, which generate mechanical  
33 confinement and induce growth arrest and survival against chemotherapy in cancer cells. As  
34 underlying mechanism, we identified stiffness-dependent nuclear localization of the four-and-a-  
35 half LIM domains 2 (FHL2) protein, leading to p53-independent high p21<sup>Cip1/Waf1</sup> nuclear  
36 expression, validated in murine and human tissue. Suggestive of a resistance-causing role, cells in  
37 the quiescence-inducing matrix became sensitive against chemotherapy upon FHL2  
38 downregulation. Thus, our biomaterial-based approach will enable systematic screens for novel  
39 compounds suited to eradicate potentially relapsing, dormant cancer cells.  
40  
41  
42  
43  
44

## 45 Introduction

46 Most cancer-associated deaths are due to metastasis, with eventual relapses spanning from  
47 years to decades despite adjuvant and chemotherapies(1, 2). Cancer dormancy has been described  
48 as one of the main mechanisms of evasion, which, due to its asymptomatic nature, poses significant  
49 technical and ethical challenges for the identification, isolation and investigation of DCCs(3). This  
50 calls for reliable *in vitro* culture systems to mimic this geno/phenotypic state to finally enable  
51 scalable drug screening campaigns for the identification of promising target drugs. Material-based,  
52 bioengineered-niche approaches have been previously pursued to induce and/or preserve the  
53 quiescence of astrocytes(4) and muscle stem cells(5), maintain neural progenitor(6) and  
54 hematopoietic cell stemness(7), investigate mechanical memory(8) and differentiation of stem  
55 cells(9), as well as to investigate cancer cell cycle progression(10, 11). Here, we harnessed a similar  
56 approach by developing ultraviolet (UV) light-initiated, thiol-ene-mediated, covalently-crosslinked  
57 alginate hydrogels, which through 3D mechanical confinement induce and maintain large  
58 populations of single breast cancer cells in a growth-arrested state. We showed that artificial  
59 quiescence-inducing matrices select for distinct populations of growth-arrested cells, with cells in  
60 the G<sub>0</sub>/G<sub>1</sub> cell cycle phase being more resistant to confinement. Combined with RNA sequencing,  
61 we revealed a stiffness-dependent nuclear localization of the four-and-a-half LIM domains 2  
62 (FHL2) protein as an underlying mechanism of quiescence, leading to a p53-independent high  
63 p21<sup>Cip1/Waf1</sup> nuclear expression, validated in murine and human tissue. Suggestive of a growth  
64 arrest-mediated drug resistance, quiescent cells became sensitive against drug treatment upon FHL2  
65 downregulation. This biomaterial-based approach with mechanically-induced quiescent cancer  
66 cells offers therapeutic applications as a simple and scalable method, to investigate large  
67 populations of dormant cancer cells, otherwise rare and inaccessible in large numbers from clinical  
68 settings, and for high throughput drug screens of novel compounds to eradicate potentially relapsing  
69 DCCs.

## 70 Results

### 71 3D mechanical confinement via covalently-crosslinked alginate yields distinct fractions and 72 populations of growth-arrested cells based on hydrogel composition

73 Building on the now widely acknowledged role of the ECM in cancer induction and  
74 progression(12, 13), we employed a versatile ECM-mimicking hydrogel encapsulation approach to  
75 investigate the effect of ECM-mediated 3D mechanical confinement on cell cycle progression. We  
76 used ultraviolet (UV) light-initiated thiol-ene-crosslinked alginate(14), an inherently inert hydrogel  
77 (non-cell adherent and non-degradable) which allows for selective modulation of parameters such  
78 as stiffness, cell adhesion or degradation (Fig.1a). Cells were encapsulated in the presence (or  
79 absence) of adhesion ligands (RGD), within degradable matrix metalloproteinases (MMP)-  
80 sensitive or non-degradable dithiothreitol (DTT)-crosslinked hydrogels (Fig.1a and Supp.Fig.1).  
81 The stiffness of the hydrogels ranged between 0.5-13kPa as a function of crosslinker concentration  
82 (Fig.1b). To monitor cell cycle progression in real-time, we genetically modified widely-used  
83 triple-negative MDA-MB-231 (MDA231) and luminal MCF7 breast cancer cell (BCC) lines,  
84 known to disseminate to secondary organs in *in vivo* models, with the fluorescence-ubiquitination-  
85 based cell cycle indicator 2 (FUCCI2)(15, 16) (Fig.1c). Time-lapse imaging of MDA-FUCCI2 cells  
86 encapsulated within alginate hydrogels of different stiffness (soft for 1kPa and stiff for 10kPa),  
87 adhesion and degradation properties, as well as on two-dimensional tissue culture plastic (2D-TCP)  
88 and in 3D Matrigel, was performed over a period of 4-5 days, followed by quantification of the cell  
89 cycle state at the experimental endpoint (Fig.1d, Supp.Mov.1). 3D Matrigel and 2D TCP yielded  
90 highly proliferative (Ki67+) and metabolically active cells (resazurin reduction) in the form of 3D  
91 spheroids and single cells, respectively (Fig.1d, Supp.Fig.2b,d). Cells within the 3D alginate groups  
92 remained mostly as single cells, with the highest fraction of S/G<sub>2</sub>/M phase cells being in the soft  
93  
94

95 group, while the stiff adherent (RGD) and degradable (MMP-sensitive) groups displayed a lower  
96 percentage of S/G<sub>2</sub>/M and higher fraction of G<sub>0</sub>/G<sub>1</sub> phase cells (Fig.1d). 3D alginate stiff yielded  
97 the highest fraction of cell cycle-arrested cells over 5 days (Fig.1d), while preserving high viability  
98 (Supp.Fig.2a). Interestingly, we noticed different sub-populations of cell cycle-arrested cells as a  
99 function of the expression (or lack of) of the licensing factor *cdt1* (G<sub>0</sub>/G<sub>1</sub> *cdt1*<sup>+/-</sup>; Fig.1d, Fig.2a,  
100 Supp.Mov.2-7). A recent mapping of protein dynamics during cell cycle progression revealed that  
101 the expression patterns of *cdt1* is highly dynamic and distinctive of different levels of quiescence,  
102 with the lowest (*cdt1*<sup>-</sup>) identifying a longer time spent in a growth-arrested state(17). MDA231 cells  
103 in quiescence-inducing alginate stiff hydrogels displayed higher resistance to chemotherapy  
104 compared to cells in proliferation-permissive 3D Matrigel (Supp.Fig.2e) and, reminiscent of post-  
105 therapeutic relapses in clinical settings, were able to exit the growth-arrested state and resumed  
106 proliferation when retrieved from the hydrogels and seeded on 2D TCP (Supp.Fig.2c).

### 107 **Dynamics of cell cycle and viability correlation reveal that G<sub>0</sub>/G<sub>1</sub> cells are substantially more** 108 **resistant to 3D mechanical confinement than cells in the S/G<sub>2</sub>/M phase**

109 To understand the dynamics of 3D mechanical confinement-induced growth arrest, we  
110 tracked single-cell MDA-FUCCI2 fluorescence intensity (f.i.) within stiff hydrogels. Cells which  
111 were in the G<sub>0</sub>/G<sub>1</sub> state at the time of encapsulation, had either lost (*cdt1*<sup>-</sup>) (Fig.2a1, b) or kept  
112 (*cdt1*<sup>+</sup>) (Fig.2a2, b) their fluorescence by the end of the experiment. On the other hand, in almost  
113 every cell initially in the S/G<sub>2</sub>/M phase, we observed a decrease in f.i. within the first few hours  
114 after encapsulation (Fig.2a3, b). By correlating cell's FUCCI2 imaging and *in situ* viability staining  
115 (calcein<sup>+</sup>; Fig.2c), we revealed that the vast majority of viable cells at day 5 were initially in the  
116 G<sub>0</sub>/G<sub>1</sub> cycle state (Fig.2c, d). We validated these results for MCF7-FUCCI2 cells (Fig.2d),  
117 confirming that cells in the G<sub>0</sub>/G<sub>1</sub> state are more resilient to 3D mechanical confinement compared  
118 to cells in the S/G<sub>2</sub>/M phase.

### 119 **Gene expression analysis of cells in quiescence-inducing versus proliferation-permissive 3D** 120 **matrices**

121 We then looked into the gene expression of quiescence-induced cells in more details. RNA-  
122 sequencing on live cells retrieved from 3D alginate stiff (Fig.3a) revealed enrichment of cell cycle  
123 and retinoblastoma-associated molecular pathways (Fig.3b-d, Supp.Fig.3, 4), as well as regulation  
124 of senescence, autophagy and apoptosis processes when compared to cells retrieved from 3D  
125 Matrigel. In particular, we noticed strong enrichment of inflammatory response-associated  
126 pathways (TNF, NFκB and IL-17 signaling) and DNA damage stimuli response (ATM, p53 and  
127 miRNA regulation of DNA damage) (Fig.3b-e, Supp.Fig.3, 4). Intriguingly, we noticed that despite  
128 increased mRNA expression of *cdkn1a* (coding for the p21 protein) upon culture in 3D alginate  
129 stiff compared to 3D Matrigel, the levels of its key upstream cell cycle regulator *p53* is lower  
130 (Fig.3e), hinting to a potential p53-independent mechanism regulating p21 expression(18). This  
131 matches the lack of correlation of p53-p21 observed in patients with estrogen receptor negative  
132 (ER-) breast cancer (Supp.Fig.5). Noticing the particularly high levels of p21 (*cdkn1a*) expression  
133 among other genes in 3D alginate (Fig.3e) and its relevance in cell cycle regulation, we decided to  
134 investigate the role of p21 in regulating mechanically-induced cancer cell cycle arrest in more  
135 detail.

### 136 **p21 and FHL2 localization in 3D matrices is stiffness-dependent and FHL2 mediates p21** 137 **localization and Ki67 expression**

138 Despite the now widely acknowledge advantages of 3D vs. 2D culture systems in studying  
139 physiologically-relevant cellular processes(19), the role of dimensionality in the expression,  
140 localization and function of p21 remains underexplored. This is of utmost importance considering  
141 that in cancer cells the p21 oncogenic vs. suppressing function is known to depend on its level of  
142 expression and intracellular localization(18). We therefore assessed these features across different

143 3D culture systems, focusing on soft and stiff 3D alginate hydrogels. As expected, the fraction of  
144 p21-positive cells was significantly higher in 3D alginate stiff compared to soft or 3D Matrigel  
145 (Supp.Fig.6), accompanied by strong enrichment of DNA repair-associated pathways (Fig.4a-b and  
146 Supp.Fig.7). Importantly, cells in 3D alginate stiff revealed a significantly higher nuclear vs.  
147 cytoplasmic (nuc./cyto. ratio) localization of p21 compared to the soft group, together with a lower  
148 fraction of proliferative cells (Ki67 expression) (Fig.4c). Inhibiting MEK/ERK, PI3K/Akt and JNK,  
149 as some of the major signaling pathways regulating cell proliferation, displayed a strong effect on  
150 p21 localization (Fig.4d).

151 Previous work on 2D cultures had found that, in MDA231 cells, p21 is induced in response  
152 to treatment with DNA damaging drugs such as doxorubicin, and this is mediated by FHL2 in a  
153 p53-independent manner(20). Notably, FHL2 was shown to be stably expressed in only a small  
154 subset of BCC lines with MDA231 being among the highest(20). Nonetheless, FHL2 localization  
155 and functional role in physiologically-relevant 3D cultures had not been addressed. We therefore  
156 investigated the nuc./cyto. ratio of FHL2 in 3D stiff compared to soft alginate hydrogels.  
157 Surprisingly, and in stark contrast to 2D cultures where soft 2D substrates lead to nuclear  
158 accumulation of FHL2(21), we observed a significantly higher expression and nuc./cyto. ratio of  
159 FHL2 in 3D stiff compared to soft alginate hydrogels (Fig.4e). This effect was mitigated by  
160 inhibiting MEK/ERK and PI3K/Akt pathways but not JNK (Fig.4f). Importantly, knock-down of  
161 FHL2 revealed a decrease in p21 nuclear localization in 3D stiff hydrogels (Fig.4g), as well as an  
162 increase in proliferation activity (Ki67; Fig.4f), pointing to FHL2 being upstream of p21. The  
163 correlated expression of *cdkn1a* and *FHL2* is also found in tumor samples of patients with ER-  
164 breast cancer (Supp.Fig.8).

### 165 **FHL2 knockdown sensitizes cells to chemotherapy**

166 We then investigated whether FHL2 knockdown sensitizes cells to chemotherapy. FHL2-  
167 silenced cells in 3D alginate stiff displayed higher viability and metabolic activity than wild-type  
168 MDA231 when untreated (vehicle) (Fig.5a). Upon exposure to mitosis-blocking chemotherapeutic  
169 Paclitaxel in a concentration-dependent fashion (0.01-0.5mM), a significant reduction in viability  
170 and metabolic activity was observed (Fig.5a), pointing to a chemo-sensitizing effect upon FHL2  
171 knockdown.

### 172 **FHL2 expression and localization in murine tissue, human primary breast tumor and human 173 early DCCs**

174 Finally, to assess the implications for human disease, we investigated FHL2 expression and  
175 localization in a preclinical mouse model with metastatic breast cancer and in human primary tumor  
176 biopsies. Remarkably, single quiescent MDA231 cells (bone-tropic 1833 subclone) spontaneously  
177 disseminated to the mouse femur revealed nuclear FHL2, as opposed to proliferative clusters with  
178 cytoplasmic FHL2 (Fig.5b, Supp.Fig.9). Similarly, human tissue biopsies of breast tumor reveal a  
179 primarily cytoplasmic/membranous localization of FHL2 (Fig.5c), matching our observation in 3D  
180 Matrigel (Fig.5d). Furthermore, we investigated human early DCCs of an M0 breast cancer patient,  
181 with only microscopy evidence of metastasis and no clinical or radiographic evidence of distant  
182 metastasis. Disseminated breast cancer cells (cytokeratin+, an epithelial marker) in the sentinel  
183 lymph node displayed varying FHL2 signal intensity suggestive of functional heterogeneity (Fig.5e,  
184 f).

185 To sum up, ligand-rich, proliferation-permissive microenvironments maintain FHL2 in the  
186 membranous regions, whereas in low or non-adherent microenvironments the increase in  
187 mechanical confinement (stiffness) results in FHL2 translocation to the nucleus, leading to high  
188 p21 nuclear expression, cell cycle arrest and chemo-resistance (Fig.6).



## 191 Discussion

192 In this study, we use a 3D quiescence-inducing engineered matrix to investigate a  
193 mechanism of chemoresistance in mechanically-induced dormant BCCs. Systematic tuning of three  
194 variables (adhesion via RGD, degradability through MMP-sensitive crosslinkers and stiffness)  
195 enables generation of different fractions of cell populations with defined and controllable cell cycle  
196 status. Here, we harness this approach and reveal a stiffness-dependent nuclear localization of the  
197 FHL2 protein which leads to p53-independent nuclear expression of p21 as a quiescence and  
198 resistance-conferring mechanism. We further show that the expression and localization of both p21  
199 and FHL2 in 3D to be strikingly different than previously-reported 2D studies, where FHL2  
200 shuttling to the nucleus was shown to be substrate rigidity-dependent, such that on soft surfaces (as  
201 opposed to stiff substrates where mechanical tension is higher) it would translocate to the nucleus  
202 and induce p21 expression(21). In contrast, in 3D matrices ligand-rich environments such as in  
203 basement membrane matrices or primary breast tumor sites, FHL2 accumulates in adhesion  
204 sites(21), whereas loss of adhesion (occurring in intrinsically non-adherent materials such as  
205 alginate), results in FHL2 release from sub-membranous regions and shuttling to cytoplasmic (soft  
206 alginate) and nuclear (stiff alginate) regions. This cascade leads to p21 nuclear expression, cell  
207 cycle arrest and drug resistance for the latter (Fig.5e). Such dimensionality-dependent behavior has  
208 been similarly reported for YAP mechanotransduction in the context of breast tumor  
209 progression(22) and stem cell fate(23). Thus, it is critical to take into account the context-dependent  
210 role of the FHL2-p21 signaling axis, given its potential dual oncogenic vs. suppressive function(18,  
211 24). Notably, omission of adhesion ligands in our quiescence-inducing matrix was intentional,  
212 stemming from recent *in vivo* observations(25) where single DCCs were shown to reside in a  
213 dormant state with expressed but not engaged integrin receptors. Other studies have similarly  
214 observed DCCs expressing low levels of adhesion molecules(26), and integrin activation being a  
215 central mediator leading to their awakening(26–29).

216 FHL2 has been previously shown to concentrate at RNA polymerase (Pol) II sites(21),  
217 inducing c-Jun, IL6 and IL8 transcription. This is reflected in our sequencing data by the strong  
218 enrichment of RNA Pol II associated genes, with JUN, IL6 and IL8 being among the top ten (out  
219 of 9427) differentially regulated genes in the alginate stiff group (Fig.3b-e). This is in line with a  
220 recent study showing IL6 pathway activation in patient-derived early disseminated BCC in bone  
221 marrow(30).

222 To further support our findings, we investigated breast cancer cells disseminated to the bone  
223 in a metastasis mouse model, human tissue biopsies of primary breast cancer and early DCCs of an  
224 M0 breast cancer patient. Here we noted nuclear FHL2 localization in single dormant DCCs  
225 (Fig.5b) as opposed to cytoplasmic FHL2 corresponding to high proliferation activity (Ki67+) in a  
226 mouse model of breast cancer metastasis (Fig 5b). Likewise, cytoplasmic/membranous FHL2 is  
227 observed in human primary breast tumor biopsies (Fig.5c) matching the findings of proliferating  
228 cancer cells in 3D Matrigel (Fig. 5d). This is in agreement with screenings of normal and malignant  
229 human breast tissues revealing higher FHL2 expression for the latter, as shown in previous  
230 studies(20, 31) and UALCAN database, while high FHL2 expression in ER- patients is associated  
231 with lower relapse-free survival rate (Supp.Fig.10). A number of disseminated breast cancer cells  
232 (cytokeratin+) were found in the sentinel lymph node both as single cells (Fig. 5e) and within cell  
233 clusters (Fig. 5f). We noted a substantial heterogeneity among the DCCs, further supporting the  
234 notion that various phenotypes exist in patients that may require different targeting approaches.

235 To conclude, we identify a stiffness-mediated FHL2 signaling mechanism in 3D  
236 bioengineered matrices inducing breast cancer cell quiescence and drug resistance, which  
237 recapitulates several aspects of patient-derived DCCs and mouse models of metastasis. Further, this  
238 approach can be exploited to generate large populations of single growth-arrested cells for simple,

239 fast and potentially scalable drug screening, since these are known to be rare and inaccessible in  
240 large numbers from clinical settings.

## 241 **Materials and Methods**

### 242 **Synthesis of peptide-crosslinked alginate hydrogels**

243  
244 Norbornene-modified alginate hydrogels with thiol-ene crosslinking were synthesized as  
245 previously described(32). Briefly, high molecular weight (265 kDa; HMW), high guluronic acid,  
246 sodium alginate (Pronova MVG; NovaMatrix) was dissolved at 1% w/v in 0.1 M 2-  
247 (N- morpholino)ethanesulfonic acid (MES; Sigma-Aldrich), 0.3M NaCl (EMD Millipore) buffer  
248 (pH 6.5) overnight at room temperature. N-hydro-xysuccinimide (NHS; Sigma-Aldrich), followed  
249 by 1-ethyl-3-(3-dimethylami-nopropyl)-carbodiimide hydrochloride (EDC; Sigma-Aldrich) were  
250 added drop-wise at 5000 molar equivalents to the alginate solution while stirring. To functionalize  
251 the alginate backbone with norbornene functional groups, 5-norbornene-2-methylamine (TCI  
252 Deutschland GmbH) was added at a theoretical degree of substitution (DS<sub>theo</sub>) of 300 molecules  
253 per alginate chain. The final concentration of both reactions was 0.6% w/v and was run while  
254 stirring at 700 rpm at room temperature for 20 h. Next, the solution was quenched by adding  
255 hydroxylamine (Sigma-Aldrich), followed by dialysis (Spectra/Por 6, MWCO 3.5 kDa; Spectrum)  
256 against a salt gradient (6 g/L to 0 g/L; Sigma-Aldrich) in ddH<sub>2</sub>O for 3 days with 3-4 changes per  
257 day. The solution was then purified with activated charcoal (Sigma-Aldrich), sterile-filtered (0.22  
258 µm; Steriflip-GP; Merck) and lyophilized. To assess the actual degree of substitution, NMR  
259 measurements were performed using an Agilent 600 MHz PremiumCOMPACT equipped with  
260 Agilent OneNMR Probe (256 scans), with samples dissolved at a final concentration of 1.5% w/v  
261 in deuterium oxide (D<sub>2</sub>O) (Supp. Fig 1b, c).

### 262 **Casting of peptide-crosslinked alginate hydrogels**

263 For hydrogel casting, the VPMS↓MRGG sequence was chosen as the enzymatically-  
264 degradable peptide crosslinker (↓ denotes the MMP cleavage site), ordered from WatsonBio  
265 Sciences at 98% purity with trifluoroacetic acid removal (Supp. Fig 1d). Double-cysteine  
266 containing dithiothreitol (DTT, Sigma-Aldrich, 43816) was used as the non-degradable crosslinker.  
267 Before casting, norbornene-modified alginate and the photoinitiator (Irgacure 2959; Sigma-  
268 Aldrich) were dissolved in phosphate-buffered saline (PBS) overnight at 50 °C under shaking.  
269 Alginate and photoinitiator concentrations were kept at 2 and 0.5% w/v respectively. The  
270 concentration of the crosslinker was changed to yield hydrogels with different mechanical  
271 properties. After mixing, the solution was pipetted with positive-displacement pipettes on a glass  
272 plated and covered with a dichloromethylsilane-coated glass slide (≥99.5%; Sigma-Aldrich). To  
273 initiate thiol-ene crosslinking, the mixture was exposed to UV light (365 nm at 10 mW/cm<sup>2</sup>,  
274 OmniCure S2000) by placing the gel sheet in a custom-built curing chamber for 10 min. Gels were  
275 then punched out using biopsy punches of 4-6 mm (Integra Miltex) and washed with PBS until  
276 further use. To render norbornene-modified alginate adherent, a thiol-containing RGD sequence  
277 (CGG- GGRGDSP; Peptide 2.0) was added to the gel precursor mix (at 0.95 mM) to bind residual  
278 norbornene groups via UV-mediated thiol-ene chemistry. For 3D cell encapsulation, a cell  
279 suspension (5x10<sup>5</sup> cells/ mL) was added to the precursor solution and mixed before UV exposure.  
280 Matrigel (356237, Corning) was used at 100% w/v concentration (~ 10mg/mL).

### 281 **Mechanical characterization**

282 Rheology measurements were performed to calculate the elastic modulus (E) of pre-formed  
283 gels. Norbornene-modified alginate (2% w/v) hydrogels with different stiffness were cast by  
284 changing the DTT crosslinker concentration (0.01-1 mg/mL). After gel equilibration overnight in  
285 PBS, frequency sweep measurements were performed from 0.01 to 10 Hz at 1% shear strain with  
286 an 8 mm parallel plate (PP08, Anton Paar) using a rheometer (Physica MCR 301; Anton Paar),

287 while keeping the temperature at 25 °C with a Peltier cooling module. The initial E modulus was  
288 then calculated as follows:  $E = 2G(1 + \nu)$  and  $G = \sqrt{G'^2 + G''^2}$  where  $G$ ,  $G'$  and  $G''$  are the shear,  
289 storage and loss moduli, respectively, and  $\nu$  the Poisson's ratio with a value of 0.5 for  
290 hydrogels(33).

## 291 Cell culture

292 MDA-MB-231 (HTB-26; ATCC), MDA-MB-231-1883 BoM (provided by Dr. Joan  
293 Massagué and purchased from the Antibody and Bioresource Core Facility of the Memorial Sloan  
294 Kettering Cancer Center, USA. The subclone 1833 is a bone tropic human cell line deriving from  
295 a metastasis formed by MDA-MB-231 TGL cells hosted in a mouse(34, 35), which in turn are  
296 MDA-MB-231 (HTB-26; ATCC) human epithelial breast cancer cells stably transduced with a  
297 lentivirus expressing a triple-fusion reporter(36)) and MCF-7 (HTB-22; ATCC) human breast  
298 cancer cell lines were cultured in low glucose Dulbecco's Modified Eagle's Medium (D6046;  
299 Sigma-Aldrich) with 10% v/v fetal bovine serum (S0615, Sigma-Aldrich) and 1%  
300 penicillin/streptomycin (Gibco). For MCF-7 cells, 0.1% insulin (I1882, Sigma-Aldrich) was added.  
301 Cells were then incubated in a 5% CO<sub>2</sub> environment at 37 °C and passaged every 3-5 days.

## 302 Viability and metabolic activity characterization

303 Live and dead cells were stained with 1.6 mM calcein AM (C125400; TRC) and 4 mM  
304 ethidium homodimer-1 (EthD-1 L3224; ThermoFisher), respectively. To measure metabolic  
305 activity, Presto blue (ThermoFisher) was used. Briefly, after 1 and 7 days of incubation, cell culture  
306 medium was replaced with 10% Presto blue reagent in DMEM and the plate incubated for at least  
307 4 h at 37 °C. Next, 100 µL of the supernatant was transferred to a black 96 well plate (655892,  
308 Greiner Bio-one) and fluorescence emission was measured at 590 nm (Cytation5, BioTek). ATP  
309 concentration was measured using CellTiter-Glo (Promega) according to the manufacturer's  
310 instruction. Briefly, a 1:1 volume of reagent and culture medium was added to each sample of a  
311 black 96 well plate (655892, Greiner Bio-one), shaken for 10 min at room temperature, and allowed  
312 to equilibrate for another 20 min before measuring bioluminescence signal (Cytation5, BioTek).

## 313 Lentiviral particle production, transduction and generation of FUCCI2 breast cancer cell 314 lines

315 As previously reported(37), FUCCI2 vectors mCherry hCdt1(30/120)/pCSII EF MCS  
316 (DDBJ/EMBL/GenBank, AB512478) and mVenus hGeminin(1/100)/pCSII EF MCS  
317 (DDBJ/EMBL/GenBank, AB512479) were purchased from the Riken Brain Science Institute  
318 (Japan) and used to generate lentivirus particles by co-transfecting HEK 293TN cells (System  
319 Biosciences) with packaging (psPAX2, Addgene plasmid, #12260) and envelope (pMD2.G  
320 (Addgene plasmid, #12259) plasmids. The supernatant was collected by centrifuging (Beckman  
321 L7-55 with SW32Ti rotor) at 22,000 rpm for 3h at 4 °C. MDA-MB-231 and MCF-7 breast cancer  
322 cell lines were first transfected with mVenus hGeminin (1/110) (multiplicity of infection (MOI) of  
323 six and five, respectively) followed by mCherry hCdt1 (30/120) at an MOI of three. Verification of  
324 successful transduction and subsequent sorting of stably expressing mVenus and mCherry cell lines  
325 were performed using flow cytometry (FACSaria™ II, Becton Dickinson).

## 326 Inhibition, RNA interference and drug response experiments

327 For inhibition experiments, the following small molecule and inhibitors were used:  
328 MEK/ERK inhibitor PD98059 (10 mM, Focus Biomolecules), JNK inhibitor SP600125 (10 mM,  
329 Focus Biomolecules) and PI3K/Akt inhibitor LY294002 (10 mM, Focus Biomolecules). The  
330 inhibitors were mixed with culture medium and refreshed every 2-3 days. To knock down FHL2,  
331 MDA-MB-231 cells were transfected with two different FHL2-targeting small interfering RNAs  
332 (Silencer siRNA, Invitrogen) or non-targeting siRNA (Stealth RNAi negative control, Invitrogen)  
333 using Lipofectamine RNAiMAX Reagent (Invitrogen), diluted in Opti-MEM reduced serum

334 medium (Gibco) for a final concentration of 10-20 nM. Cells were transfected 2-3 days before  
335 encapsulation following manufacturer's instructions. To assess MDA-MB-231 response to  
336 chemotherapy, Paclitaxel (Tokyo Chemical Industry) was diluted at 0.01, 0.1 and 0.5 mM and  
337 added to the culture medium after 3-5 days post-encapsulation for a drug treatment of 2 days. The  
338 highest concentration tested contained around 1% (v/v) of DMSO, which was used as vehicle  
339 medium and didn't show any negative effect on cell viability.

### 340 **Immunofluorescence staining**

341 Gels with encapsulated cells were washed (3x) with PBS and fixed with 4%  
342 paraformaldehyde (PFA, Boster, #AR1068) for 30 min at room temperature, (3x) washed with 3%  
343 w/v bovine serum albumin (BSA, Sigma Aldrich), permeabilized with 0.1 % w/v Triton X 100  
344 (Sigma-Aldrich, #T8787) for 15 min with a final washing (3x) step with 3% BSA. Whole-mount  
345 primary antibody staining was performed at 4 °C overnight, diluted in a 3% BSA+0.1% Triton X  
346 100 buffer solution under mild shaking. The gels were then washed (3x) with 3% BSA and  
347 incubated with secondary antibody at 4 °C overnight with the same dilution buffer under mild  
348 shaking. The samples were finally imaged after a last washing step with PBS (3x). The primary  
349 antibodies and respective concentrations used in this study are the following: anti-Ki67 (2 µg/mL,  
350 ab15580, abcam), anti-p21<sup>Cip1/Waf1</sup> (0.48 µg/mL, 2947S, Cell Signaling), anti-FHL2 (0.5 µg/mL,  
351 HPA006028, Sigma/Prestige Antibodies). The secondary antibodies are: Alexa Fluor 405 (10  
352 µg/mL, ab175651, abcam) and Alexa Fluor 647 (4 µg/mL, A21244, Invitrogen). To stain for  
353 nucleus and cytoskeleton, DAPI (1:1000, Roche) and Alexa Fluor 488 Phalloidin (1:50, Invitrogen)  
354 were used.

### 355 **Immunoblot**

356 Cells were first lysed with RIPA buffer (Abcam) for 5 min on ice and then collected in  
357 Eppendorf tubes. Protein concentration was calculated following Bradford assay (Bradford reagent,  
358 Sigma-Aldrich). A 1:50 mixture of β-mercaptoethanol (Acros Organics) and 2x Tricine sample  
359 buffer (Bio-Rad) was added at a 1:1 volume to the cell lysates. The mixture was then heated to  
360 95 °C for 5 min and loaded into pre-cast polyacrylamide gels (Mini-PROTEAN TGX, Bio-Rad)  
361 for electrophoresis in TGS buffer (Bio-Rad) at 100 V for 30 min, then 200 V for 30 min (Mini-  
362 PROTEAN Tetra System, Bio-Rad). Proteins in the gels were then blotted onto to a PVDF  
363 membrane (BioTrace, PALL) at 150 V for 90 min in ice-cold transfer buffer (1:5 volume of 100%  
364 Methanol in TGS buffer). Next, the membrane was transferred to TBST buffer (150 mM NaCl, 20  
365 mM Tris-base, 0.1% Tween20), blocked in 5% BSA in TBST buffer for 1 h under gentle shaking,  
366 washed in TBST (3x) and incubated with primary antibodies diluted in 1% BSA in TBST overnight  
367 at 4 °C. After washing with TBST (3x), the membrane was incubated with an HRP-linked  
368 secondary antibody for 1 h at room temperature, after which the chemoluminescence substrate  
369 (SuperSignal West Pico PLUS, Thermo Scientific) was added before visualizing it with a blot  
370 imager (G:BOX Chemi XX6/XX9, Syngene). GAPDH (1:1000, 2118, Cell Signaling) was used as  
371 housekeeping gene and HRP-linked (1:1000, 7074, Cell Signaling) as secondary antibody.

### 372 **Cell retrieval from 3D gels**

373 For RNA sequencing, MDA-MB-231 cells were retrieved from 3D alginate stiff, soft and  
374 3D Matrigel. Briefly, alginate hydrogels were incubated with alginate lyase (2mg/mL, Sigma  
375 Aldrich, A1603) in HBSS (ThermoFisher, 14185045) for 30 min at 37 °C with three mixture steps  
376 every 10 min. For Matrigel, pre-cooled (4°C) HBSS was added and mixed for 5-10 min at room  
377 temperature, followed by incubation with Trypsin/EDTA (0.05%/0.02%, PAN Biotech, P10-  
378 023100) for 5 min at 37 °C. Cells were then washed twice with HBSS for 5 min. Next, retrieved  
379 cells were stained using a LIVE/DEAD fixable cell staining method (ThermoFisher, L34969)  
380 following manufacturer's instructions, and viable cells were sorted via FACS Aria II flow cytometer  
381 (Becton Dickinson). Approximately 1500 sorted cells per sample were then lysed using pre-cooled



382 (4 °C) RLN buffer (0.05 M Tri-HCl pH 8.0, 0.14 M NaCl, 0.0015 M MgCl<sub>2</sub>, 0.5 % v/v Nonidet P-  
383 40/IGEPAL (Sigma Aldrich, 56741) and 1000 U/mL RNase inhibitor (Promega, N2615), 0.001 M  
384 DTT) on ice for 5 min. The lysates were then centrifuged with a pre-cooled centrifuge for 2 min at  
385 300 x g, the supernatants transferred to -80 °C and stored until further processing.

### 386 RNA sequencing and analysis

387 Samples were resuspended in 5 µl 1X NEBNext Cell Lysis Buffer of the NEBNext Single  
388 Cell/Low Input RNA Library Prep Kit (NEB, E6420). After 5 min incubation at RT, 2.5X RNA XP  
389 Clean Up Beads (Beckman Coulter, A63987) were added to the sample by pipetting up and down.  
390 Then, samples were incubated for 5 min at RT, the beads were pelleted on a magnet, the supernatant  
391 was removed, the samples were washed twice with 80% ethanol while remaining on the magnet,  
392 and finally the beads were resuspended in 8 µl nuclease-free water. The reverse transcription was  
393 conducted according to the manual of the NEBNext Single Cell/Low Input RNA Library Prep Kit  
394 in the presence of the beads. Next, the beads were pelleted on the magnet and the supernatant was  
395 used for the following PCR amplification as described in the manual. Twenty-one PCR cycles were  
396 applied, because the RNA concentration was below the detection limit of the Qubit RNA HS Assay  
397 Kit (Thermo Fisher, Q23852). The cleanup, quality control, fragmentation, and adapter ligation  
398 steps were performed as described in the kit manual. NEBNext Multiplex Oligos for Illumina  
399 (Index Primer Set 1) (NEB, 7335S) were used for the final PCR amplification. The fragment length  
400 distribution of the final libraries was determined using a 2100 Bioanalyzer Instrument (Agilent)  
401 with a High Sensitivity DNA kit (Agilent, 5067-4626). The libraries were quantified by qPCR with  
402 the KAPA Library Quantification Kit (Roche, KK4854). The nine samples were divided into two  
403 pools (one pool of four samples, the other of five samples) with equimolar amount. The pools were  
404 sequenced on an Illumina MiSeq with 2 x 150 bp.

405 After demultiplexing, raw FASTQ data were given to an in-house mRNA analysis pipeline  
406 0.9.5.5. BBDuk 38.76(38) was used to trim the raw sequence data from soft, 3D matrigel and 3D  
407 alginate stiff, deleting any residual adapter sequences and low-quality bases at the ends of each  
408 read. BioBloom Tools 2.0.13(39) was used to decontaminate reads from the genomes *Mus*  
409 *musculus* (mm38), *Escherichia coli* (BL21), *Mycoplasma pneumoniae* (M129), *Sphingobium* sp.  
410 (SYK-6), *Bradyrhizobium japonicum* (USDA 110), *Pichia pastoris* (GS115), *Malessia globosa*  
411 (CBS 7966), *Aspergillus fumigatus* (Af293), and a set of viral genomes (RefSeq, 5k+ genomes).  
412 All reads that did not map exclusively to the transcriptome of hg38 (GENCODE version 27,  
413 GRCh38.p10) were labeled as potentially contaminated and were removed from further processing.  
414 FastQC 0.11.9(40) was used to evaluate sequence quality per sample before as well as after  
415 trimming and decontamination. In addition, all samples were examined as a collective with  
416 MultiQC 1.8(41). Following that, the cleaned sample reads were aligned to the hg38 reference  
417 genome using STAR 2.5.1b(42). Using featureCounts from Subread 2.0.0, uniquely mapping reads  
418 were counted per gene and sample(43). Further quality criteria were evaluated, including library  
419 complexity (using Preseq 2.0.3(44)) and the genomic origin of the reads and the 5'-3'-bias (both  
420 using QualiMap 2.2.2d(45)). The final counts table of 9 samples were utilized for differential  
421 expression analysis.

422 All the subsequent steps after the count tables were performed in R programming language  
423 4.0.2 (2020-06-22)(46). Matrix table containing gene counts were visualized using Principle  
424 Component Analysis (PCA) and t-distributed stochastic neighbor embedding (t-SNE) clustering  
425 techniques. For PCA, raw counts were scaled and pcomp function from stats package was  
426 employed. tSNE plots were constructed using Rtsne 0.15(47). Subsequent steps including Quality  
427 Control (QC) analysis, filtering, normalization, feature selection, scaling, regression of unwanted  
428 variables were performed using Seurat package 4.0.2(48). Default parameters were taken for all  
429 used functions unless otherwise mentioned. Normalization was done using 'log.normalize' method  
430 with a scale factor of  $1 \times 10^{-6}$  to obtain logCPM count values and 2,000 most variable genes were

431 used for feature selection. Only mitochondrial genes were regressed out during scaling, cell cycle  
432 associated genes did not have an effect on the cell-to-cell clustering. “DESeq2” method was applied  
433 to do differential expression analysis between the three groups, soft, stiff and matrigel and in  
434 addition testing of genes was limited to a logFoldChange (logFC) cutoff of 1. Further, the  
435 differentially expressed genes were manually filtered for an adjusted *p-value* of 0.05. Finally,  
436 volcano plots were constructed using EnhancedVolcano 1.8.0(49). In addition to applying single  
437 cell method, Seurat, we also applied pure bulk RNA seq method, DESeq2(50), to perform the data  
438 analysis of the single cell pool samples. Results from both methods were highly similar including  
439 the list of differentially expressed genes, their respective fold changes and adjusted *p-value*. We  
440 chose to report results from Seurat due to the zero-inflated count distribution of our data which is  
441 typical of single cells than bulk RNA data (Supp.Fig.4).

442 Gene Set Enrichment Analysis (GSEA) of significantly Differentially Expressed Genes  
443 (DEGs) (adjusted *p-value* < 0.05 and |logFC| > 1) into functional categories were performed using  
444 Bioconductor packages 1.30.15. Goseq 1.42.0(51) and clusterProfiler 3.18.1(52) were used,  
445 respectively, to conduct Gene Ontology (GO)(53) and Kyoto Encyclopedia of Genes and Genomes  
446 (KEGG)(54) enrichment analyses. All the enrichment plots including GSEA, dot plot and heatmap  
447 were made using built-in functions in Seurat package or ggplot2 3.3.3(55). Network maps were  
448 processed based on the selected enriched GO categories using Cytoscape 3.8.2 and enrichment Map  
449 plugin(56).

## 450 **Animal experiment**

451 12-week-old female BALB/c nude mice (CAnN.Cg-Foxn1nu/Crl, Charles River, Sulzfeld,  
452 Germany) were acclimatized in the animal facility of the Charité-Universitätsmedizin Berlin and  
453 housed with ad libitum access to food and water. Mice injected into the left ventricle of the heart  
454 with MDA-MB-231-1833 BoM cells ( $5 \times 10^5$  cells in 100  $\mu$ L ice cold PBS), using a 27G needle,  
455 under ultrasound guidance (Vevo2100, FUJIFILM VisualSonics Inc., Canada). The animals  
456 received Carprosol (CP-Pharma Handelsgesellschaft mbH, Burgdorf, Germany) and Bupresol (CP-  
457 Pharma Handelsgesellschaft mbH, Burgdorf, Germany) as analgesic drugs during and after the  
458 injection. The animals were anesthetized using isoflurane (CP-Pharma Handelsgesellschaft mbH,  
459 Burgdorf, Germany) and the eyes were protected from drying with Pan-Ophtal gel (Dr. Winzer  
460 Pharma GmbH, Berlin, Germany). The mouse was sacrificed after 2 weeks by cervical dislocation.  
461 The hind limbs were harvested and fixed with 4% paraformaldehyde (PFA) in phosphate-buffered  
462 saline (PBS) for 12 h at 4 °C and stored in PBS until further processing. All animal experiments  
463 were carried out according to the policies and procedures approved by local legal research animal  
464 welfare representatives (LAGeSo Berlin, G0224/18).

465 For each mouse, bones of one limb were cold embedded at 4°C in poly(methyl  
466 methacrylate) (PMMA) (Technovit 9100, Kulzer, Germany), following the manufacturer’s  
467 instructions. Briefly, samples were dehydrated in an ascending ethanol series, followed by a xylene  
468 washing step, infiltration and embedding in PMMA. The staining was performed on 6  $\mu$ m thick  
469 longitudinal sections using a standard protocol of Haematoxylin and Eosin staining (H & E Rapid  
470 kit, Clin-Tech, Surrey, UK). Samples were washed in tap water, followed by staining in Carazzi’s  
471 double-strength Haematoxylin. After another wash in tap water, the slides were stained in Eosin,  
472 rinsed in tap water, dehydrated and mounted. The stained sections were imaged with a Keyence  
473 Digital Microscope (VKX-5550E, Keyence, Germany). For immunostaining of the slides, after  
474 deplastification and rehydration, antigen retrieval was performed (sodium citrate pH 6.0/ 0.05%  
475 Tween20) at 105°C for 15 min, followed by 10 min quenching of endogenous peroxidase activity  
476 with 3% hydrogen peroxide (Sigma-Aldrich), and a final blocking was performed with Background  
477 Sniper (Biocare Medical, Concord, CA, USA) for 10 min. Primary (FHL2 2  $\mu$ g/mL and Ki67 2  
478  $\mu$ g/mL) and secondary antibodies (same as for in vitro immunofluorescence staining) were diluted  
479 in Dako antibody diluent (Dako, Germany). Washing steps were done in Dako washing buffer.

480 Slides were then mounted with Vectashield antifade mounting medium (Biozol, Germany)  
481 following manufacturer's instructions.

482 Bones of the other limb of the mouse were freeze embedded following the method of the  
483 SECTION-LAB Co. Ltd. (Hiroshima, Japan). The samples were dehydrated in an ascending  
484 sucrose solution (10%, 20% and 30% in distilled water) for 24 h each at 4°C. Following this, a  
485 metal mold was placed in cooled isopropanol and filled with embedding medium (SCEM;  
486 SECTION-LAB Co. Ltd.), placing the bone in the middle. Cryosections with a thickness of 20 µm  
487 were cut following the Kawamoto method(57) using a cryostat (Leica CM3060S). The section was  
488 collected using a Kawamoto film (cryofilm type II C(9)) and later attached to a microscopic slide  
489 and stored at -20°C until further use. For immunostaining the slides were blocked with blocking  
490 buffer (1%BSA/ 0.1%Tween20 in PBS). Primary and secondary antibodies were diluted in blocking  
491 buffer and incubated for at least 4 and 1h at room temperature, respectively. Washing steps (2x for  
492 15min) were conducted in washing buffer (0.1%Tween20 in PBS) and distilled water. Slides were  
493 then mounted with Dako fluorescence mounting media (S302380-2, Agilent Technologies).

#### 494 **Immunofluorescence staining of human early DCCs in lymph node samples of an M0 breast** 495 **cancer patient**

496 After informed consent (ethics vote number 18-948-101), the sentinel lymph node of an  
497 M0-stage breast cancer patient (i.e. with no evidence of distant metastasis) was first divided into  
498 two halves and one half examined by histopathology. The other half was disaggregated  
499 mechanically (DAKO Medimachine, DAKO) to generate a single-cell suspension. Then,  
500 mononuclear cells were isolated using a density gradient centrifugation (60% Percoll solution,  
501 Amersham) and plated onto adhesive slides. After sedimentation of the cells, the supernatant was  
502 discarded and slides were air-dried and stored at -20°C. For immunofluorescence staining of FHL2  
503 and Cytokeratin 8/18/19, the slides were first thawed at RT and moistened with PBS. Cells were  
504 fixed with 2% PFA (Sigma, P6148) for 10 min, washed twice with PBS and permeablized with  
505 0.05% TritonX100 for 5 min. After two additional washing steps with PBS, cells were blocked with  
506 PBS/10% AB serum (#805135, Bio-Rad) for 1.5 hours at RT. Primary antibody incubation with  
507 monoclonal mouse anti-human Cytokeratin 8/18/19 (2 µg/mL, clone A45-B/B3, AS Diagnostik)  
508 and polyclonal rabbit anti-human FHL2 (2 µg/mL, HPA006028, Sigma/Prestige Antibodies) was  
509 performed at 4 °C overnight in PBS/10% AB serum. Following washing with PBS (4x 20 min), the  
510 slides were incubated with secondary antibodies, anti-mouse AlexaFluor 488 (5 µg/mL, A11029,  
511 Invitrogen) and anti-rabbit AlexaFluor Plus 647 (5 µg/mL, A32733, Invitrogen) and DAPI  
512 (1µg/mL, MBD0015, Sigma) in PBS/5% AB serum/2.5% goat serum for 1.5 hours. After washing  
513 off the secondary antibodies (PBS 3x 10 min) the slides were mounted with SlowFade™ Glass  
514 Soft-set Antifade Mountant (S36917, Invitrogen) and imaged on Zeiss LSM980. Images were  
515 processed with ImageJ (v.1.53q) to show the max-z-projections.

#### 516 **Image acquisition and analysis**

517 Live-cell imaging was conducted in a stage top incubator (Okolab, UNO-T-H-CO<sub>2</sub>)  
518 mounted on an inverted epifluorescence microscope (Zeiss, AxioObserver 7) and a 10x, 0.3 NA  
519 objective at 37 °C and 5% CO<sub>2</sub>. Images were recorded every 6 h for 4-5 days. For FUCCI2 image  
520 analysis, live-cell imaging of cells on 2D TCP or 3D hydrogels was performed and mCherry and  
521 mVenus fluorescence signals were recorded every 6 h. Briefly, after choosing a focus plane at the  
522 beginning of the experiment for each field of view, a z-stack of this region/20 µm was acquired  
523 around this position, and phase contrast as well as fluorescence images were recorded.

524 At the end of the experiment, *in situ* viability staining with calcein was performed and the  
525 same z-stack/middle-focus plain as the final timelapse acquisition step was acquired. This allowed  
526 longitudinal correlation of viability at the end of the experiment with cell cycle progression over  
527 the course of the experiment. The number of cdt1- cells at the final timepoint was counted as the

528 difference between FUCCI2+ cells (cells that either express mCherry or mVenus) at the initial and  
529 the last timepoint, with additional reference to phase contrast images. Next, viable (calcein+) single  
530 cells were counted and the dynamics of their FUCCI2 fluorescence signal extracted using a semi-  
531 automated custom-made MATLAB script. To do this, viable cells were picked and tracked over  
532 and mean nuclear FUCCI2 intensity was extracted.

533 To quantify viability, projected images were thresholded for each channel corresponding to  
534 viable (calcein +) or dead (EthD-1) cells using a counting custom-made MATLAB script. To  
535 quantify immunofluorescence, images were first thresholded for nucleus (DAPI) and cytoskeleton  
536 (F-Actin) to localize single cells, after which the immunofluorescence signal intensity within the  
537 defined boundaries was extracted for each cell. The background signal of negatively-stained  
538 samples was used to define the threshold for positive cells. The described process was performed  
539 using an automated custom-made MATLAB script.

540 To quantify p21 and FHL2 localization, a Leica SP8 confocal microscope with 63x, 1.4 NA  
541 oil-immersion objective was used. Briefly, images were thresholded for nucleus (DAPI) and  
542 cytoskeleton (F-Actin) to define the respective intracellular regions, after which p21 or FHL2  
543 average intensity within each region was recorded. The described process was performed using an  
544 automated custom-made MATLAB script.

545 Images of human tissue samples from patients with primary breast cancer were obtained  
546 from the Human Protein Atlas ([www.proteinatlas.org](http://www.proteinatlas.org))(58). Samples with strong FHL2 intensity  
547 were selected, of which the localization was already designated as being either nuclear or  
548 cytoplasmic.

## 549 **Statistical analysis**

550 For statistical comparison between two groups, two-tailed student's t-test or Mann-Whitney  
551 U-test were performed for normally-distributed or non-parametric groups, respectively (\*:  $p \leq 0.05$ ,  
552 \*\*:  $p \leq 0.01$ , \*\*\*:  $p \leq 0.001$ , \*\*\*\*:  $p \leq 0.0001$ ). One-way Anova with Tukey's correction or Kruskal-  
553 Wallis test with Dunn's correction were conducted for multiple-group comparison. Error bars  
554 indicate mean and standard deviation used for fraction graphs. Datasets shown as box plots with  
555 median, for 25<sup>th</sup> to 75<sup>th</sup> percentiles and whiskers for minimum and maximum used for ratio graphs.  
556 Violin plots show dashed lines for median and dotted lines for the two quartile lines, used for  
557 fluorescence intensity graphs. GraphPad Prism 8 software was used to plot the data and for  
558 statistical analysis.

559

560

561

## 562 **References**

563

- 564 1. C. A. Klein, Cancer progression and the invisible phase of metastatic colonization. *Nat. Rev.*  
565 *Cancer*. **20**, 681–694 (2020).
- 566 2. C. M. Ghajar, Metastasis prevention by targeting the dormant niche. *Nat. Rev. Cancer*. **15**,  
567 238–247 (2015).
- 568 3. M. Montagner, E. Sahai, In vitro Models of Breast Cancer Metastatic Dormancy. *Front. Cell*  
569 *Dev. Biol.* **8**, 1–10 (2020).
- 570 4. S. Galarza, A. J. Crosby, C. Pak, S. R. Peyton, Control of Astrocyte Quiescence and  
571 Activation in a Synthetic Brain Hydrogel. *Adv. Healthc. Mater.* **9**, 1901419 (2020).
- 572 5. M. Quarta, J. O. Brett, R. DiMarco, A. De Morree, S. C. Boutet, R. Chacon, M. C. Gibbons,  
573 V. A. Garcia, J. Su, J. B. Shrager, S. Heilshorn, T. A. Rando, An artificial niche preserves  
574 the quiescence of muscle stem cells and enhances their therapeutic efficacy. *Nat. Biotechnol.*  
575 **34**, 752–759 (2016).



- 576 6. C. M. Madl, B. L. LeSavage, R. E. Dewi, C. B. Dinh, R. S. Stowers, M. Khariton, K. J.  
577 Lampe, D. Nguyen, O. Chaudhuri, A. Enejder, S. C. Heilshorn, Maintenance of neural  
578 progenitor cell stemness in 3D hydrogels requires matrix remodelling. *Nat. Mater.* **16**, 1233–  
579 1242 (2017).
- 580 7. A. Roch, S. Giger, M. Girotra, V. Campos, N. Vannini, O. Naveiras, S. Gobaa, M. P. Lutolf,  
581 Single-cell analyses identify bioengineered niches for enhanced maintenance of  
582 hematopoietic stem cells. *Nat. Commun.* **8**, 221 (2017).
- 583 8. C. Yang, M. W. Tibbitt, L. Basta, K. S. Anseth, Mechanical memory and dosing influence  
584 stem cell fate. *Nat. Mater.* **13**, 645–652 (2014).
- 585 9. S. Khetan, M. Guvendiren, W. R. Legant, D. M. Cohen, C. S. Chen, J. A. Burdick,  
586 Degradation-mediated cellular traction directs stem cell fate in covalently crosslinked three-  
587 dimensional hydrogels. *Nat. Mater.* **12**, 458–465 (2013).
- 588 10. S. Pradhan, J. H. Slater, Tunable hydrogels for controlling phenotypic cancer cell states to  
589 model breast cancer dormancy and reactivation. *Biomaterials.* **215**, 119177 (2019).
- 590 11. S. Nam, V. K. Gupta, H. Lee, J. Y. Lee, K. M. Wisdom, S. Varma, E. M. Flaum, C. Davis,  
591 R. B. West, O. Chaudhuri, Cell cycle progression in confining microenvironments is  
592 regulated by a growth-responsive TRPV4-PI3K/Akt-p27 Kip1 signaling axis. *Sci. Adv.* **5**,  
593 eaaw6171 (2019).
- 594 12. O. Chaudhuri, S. T. Koshy, C. Branco da Cunha, J.-W. Shin, C. S. Verbeke, K. H. Allison,  
595 D. J. Mooney, Extracellular matrix stiffness and composition jointly regulate the induction  
596 of malignant phenotypes in mammary epithelium. *Nat. Mater.* **13**, 970–978 (2014).
- 597 13. B. R. Seo, P. Bhardwaj, S. Choi, J. Gonzalez, R. C. Andresen Eguiluz, K. Wang, S. Mohanan,  
598 P. G. Morris, B. Du, X. K. Zhou, L. T. Vahdat, A. Verma, O. Elemento, C. A. Hudis, R. M.  
599 Williams, D. Gourdon, A. J. Dannenberg, C. Fischbach, Obesity-dependent changes in  
600 interstitial ECM mechanics promote breast tumorigenesis. *Sci. Transl. Med.* **7**, 301ra130-  
601 301ra130 (2015).
- 602 14. A. Lueckgen, D. S. Garske, A. Ellinghaus, D. J. Mooney, G. N. Duda, A. Cipitria,  
603 Enzymatically-degradable alginate hydrogels promote cell spreading and in vivo tissue  
604 infiltration. *Biomaterials.* **217**, 119294 (2019).
- 605 15. A. Sakaue-Sawano, H. Kurokawa, T. Morimura, A. Hanyu, H. Hama, H. Osawa, S.  
606 Kashiwagi, K. Fukami, T. Miyata, H. Miyoshi, T. Imamura, M. Ogawa, H. Masai, A.  
607 Miyawaki, Visualizing Spatiotemporal Dynamics of Multicellular Cell-Cycle Progression.  
608 *Cell.* **132**, 487–498 (2008).
- 609 16. A. Sakaue-Sawano, T. Kobayashi, K. Ohtawa, A. Miyawaki, Drug-induced cell cycle  
610 modulation leading to cell-cycle arrest, nuclear mis-segregation, or endoreplication. *BMC*  
611 *Cell Biol.* **12**, 2 (2011).
- 612 17. S. Gookin, M. Min, H. Phadke, M. Chung, J. Moser, I. Miller, D. Carter, S. L. Spencer, A  
613 map of protein dynamics during cell-cycle progression and cell-cycle exit. *PLOS Biol.* **15**,  
614 e2003268 (2017).
- 615 18. A. Karimian, Y. Ahmadi, B. Yousefi, Multiple functions of p21 in cell cycle, apoptosis and  
616 transcriptional regulation after DNA damage. *DNA Repair (Amst).* **42**, 63–71 (2016).
- 617 19. B. M. Baker, C. S. Chen, Deconstructing the third dimension – how 3D culture  
618 microenvironments alter cellular cues. *J. Cell Sci.* **125**, 3015–3024 (2012).
- 619 20. B. T. Martin, K. Kleiber, V. Wixler, M. Raab, B. Zimmer, M. Kaufmann, K. Strebhardt,  
620 FHL2 Regulates Cell Cycle-Dependent and Doxorubicin-Induced p21Cip1/Waf1  
621 Expression in Breast Cancer Cells. *Cell Cycle.* **6**, 1779–1788 (2007).
- 622 21. N. Nakazawa, A. R. Sathe, G. V. Shivashankar, M. P. Sheetz, Matrix mechanics controls  
623 FHL2 movement to the nucleus to activate p21 expression. *Proc. Natl. Acad. Sci.* **113**,  
624 E6813–E6822 (2016).
- 625 22. J. Y. Lee, J. K. Chang, A. A. Dominguez, H. Lee, S. Nam, J. Chang, S. Varma, L. S. Qi, R.

- 626 B. West, O. Chaudhuri, YAP-independent mechanotransduction drives breast cancer  
627 progression. *Nat. Commun.* **10**, 1848 (2019).
- 628 23. O. Y. Dudaryeva, A. Bucciarelli, G. Bovone, F. Huwyler, S. Jaydev, N. Broguiere, M. Al-  
629 Bayati, M. Lütolf, M. W. Tibbitt, 3D Confinement Regulates Cell Life and Death. *Adv.*  
630 *Funct. Mater.* **i**, 2104098 (2021).
- 631 24. K. Kleiber, K. Strebhardt, B. T. Martin, The biological relevance of FHL2 in tumour cells  
632 and its role as a putative cancer target. *Anticancer Res.* **27**, 55–62 (2007).
- 633 25. J. Albregues, M. A. Shields, D. Ng, C. G. Park, A. Ambrico, M. E. Poindexter, P.  
634 Upadhyay, D. L. Uyeminami, A. Pommier, V. Küttner, E. Bružas, L. Maiorino, C. Bautista,  
635 E. M. Carmona, P. A. Gimotty, D. T. Fearon, K. Chang, S. K. Lyons, K. E. Pinkerton, L. C.  
636 Trotman, M. S. Goldberg, J. T. H. Yeh, M. Egeblad, Neutrophil extracellular traps produced  
637 during inflammation awaken dormant cancer cells in mice. *Science (80-. )*. **361**, eaao4227  
638 (2018).
- 639 26. D. Barkan, H. Kleinman, J. L. Simmons, H. Asmussen, A. K. Kamaraju, M. J. Hoenorhoff,  
640 Z. -y. Liu, S. V. Costes, E. H. Cho, S. Lockett, C. Khanna, A. F. Chambers, J. E. Green,  
641 Inhibition of Metastatic Outgrowth from Single Dormant Tumor Cells by Targeting the  
642 Cytoskeleton. *Cancer Res.* **68**, 6241–6250 (2008).
- 643 27. J. A. Aguirre Ghiso, Inhibition of FAK signaling activated by urokinase receptor induces  
644 dormancy in human carcinoma cells in vivo. *Oncogene.* **21**, 2513–2524 (2002).
- 645 28. T. Shibue, R. A. Weinberg, Integrin 1-focal adhesion kinase signaling directs the  
646 proliferation of metastatic cancer cells disseminated in the lungs. *Proc. Natl. Acad. Sci.* **106**,  
647 10290–10295 (2009).
- 648 29. E. E. Er, M. Valiente, K. Ganesh, Y. Zou, S. Agrawal, J. Hu, B. Griscom, M. Rosenblum,  
649 A. Boire, E. Brogi, F. G. Giancotti, M. Schachner, S. Malladi, J. Massagué, Pericyte-like  
650 spreading by disseminated cancer cells activates YAP and MRTF for metastatic colonization.  
651 *Nat. Cell Biol.* **20**, 966–978 (2018).
- 652 30. M. Werner-Klein, A. Grujovic, C. Irlbeck, M. Obradović, M. Hoffmann, H. Koerkel-Qu, X.  
653 Lu, S. Treitschke, C. Köstler, C. Botteron, K. Weidele, C. Werno, B. Polzer, S. Kirsch, M.  
654 Gužvić, J. Warfsmann, K. Honarnejad, Z. Czyz, G. Feliciello, I. Blochberger, S. Grunewald,  
655 E. Schneider, G. Haunschild, N. Patwary, S. Guetter, S. Huber, B. Rack, N. Harbeck, S.  
656 Buchholz, P. Rümmele, N. Heine, S. Rose-John, C. A. Klein, Interleukin-6 trans-signaling  
657 is a candidate mechanism to drive progression of human DCCs during clinical latency. *Nat.*  
658 *Commun.* **11**, 4977 (2020).
- 659 31. B. Gabriel, D.-C. Fischer, M. Orlowska-Volk, A. zur Hausen, R. Schüle, J. M. Müller, A.  
660 Hasenburger, Expression of the Transcriptional Coregulator FHL2 in Human Breast Cancer:  
661 A Clinicopathologic Study. *J. Soc. Gynecol. Investig.* **13**, 69–75 (2006).
- 662 32. A. Lueckgen, D. S. Garske, A. Ellinghaus, D. J. Mooney, G. N. Duda, A. Cipitria,  
663 Enzymatically-degradable alginate hydrogels promote cell spreading and in vivo tissue  
664 infiltration. *Biomaterials.* **217**, 119294 (2019).
- 665 33. S. T. Gould, N. J. Darling, K. S. Anseth, Small peptide functionalized thiol–ene hydrogels  
666 as culture substrates for understanding valvular interstitial cell activation and de novo tissue  
667 deposition. *Acta Biomater.* **8**, 3201–3209 (2012).
- 668 34. A. J. Minn, G. P. Gupta, P. M. Siegel, P. D. Bos, W. Shu, D. D. Giri, A. Viale, A. B. Olshen,  
669 W. L. Gerald, J. Massagué, Genes that mediate breast cancer metastasis to lung. *Nature.* **436**,  
670 518–524 (2005).
- 671 35. Y. Kang, P. M. Siegel, W. Shu, M. Drobnjak, S. M. Kakonen, C. Cordon-Cardo, T. A. Guise,  
672 J. Massagué, A multigenic program mediating breast cancer metastasis to bone. *Cancer Cell.*  
673 **3**, 537–549 (2003).
- 674 36. V. Ponomarev, M. Doubrovin, I. Serganova, J. Vider, A. Shavrin, T. Beresten, A. Ivanova,  
675 L. Ageyeva, V. Tourkova, J. Balatoni, W. Bornmann, R. Blasberg, J. Gelovani Tjuvajev, A

- 676 novel triple-modality reporter gene for whole-body fluorescent, bioluminescent, and nuclear  
677 noninvasive imaging. *Eur. J. Nucl. Med. Mol. Imaging*. **31**, 740–751 (2004).
- 678 37. H. M. Taïeb, D. S. Garske, J. Contzen, M. Gossen, L. Bertinetti, T. Robinson, A. Cipitria,  
679 Osmotic pressure modulates single cell cycle dynamics inducing reversible growth arrest and  
680 reactivation of human metastatic cells. *Sci. Rep.* **11**, 13455 (2021).
- 681 38. BBtools software suite. *JGI DataScience* (2019).
- 682 39. J. Chu, S. Sadeghi, A. Raymond, S. D. Jackman, K. M. Nip, R. Mar, H. Mohamadi, Y. S.  
683 Butterfield, A. G. Robertson, I. Birol, BioBloom tools: fast, accurate and memory-efficient  
684 host species sequence screening using bloom filters. *Bioinformatics*. **30**, 3402–3404 (2014).
- 685 40. S. Andrews, FastQC: A Quality Control Tool for High Throughput Sequence Data. (2010).
- 686 41. P. Ewels, M. Magnusson, S. Lundin, M. Käller, MultiQC: summarize analysis results for  
687 multiple tools and samples in a single report. *Bioinformatics*. **32**, 3047–3048 (2016).
- 688 42. A. Dobin, C. A. Davis, F. Schlesinger, J. Drenkow, C. Zaleski, S. Jha, P. Batut, M. Chaisson,  
689 T. R. Gingeras, STAR: ultrafast universal RNA-seq aligner. *Bioinformatics*. **29**, 15–21  
690 (2013).
- 691 43. Y. Liao, G. K. Smyth, W. Shi, The Subread aligner: fast, accurate and scalable read mapping  
692 by seed-and-vote. *Nucleic Acids Res.* **41**, e108–e108 (2013).
- 693 44. C. Deng, T. Daley, A. Smith, Applications of species accumulation curves in large-scale  
694 biological data analysis. *Quant. Biol.* **3**, 135–144 (2015).
- 695 45. K. Okonechnikov, A. Conesa, F. García-Alcalde, Qualimap 2: advanced multi-sample  
696 quality control for high-throughput sequencing data. *Bioinformatics*. **32**, btv566 (2015).
- 697 46. R. C. Team, R: A Language and Environment for Statistical Computing. (2020).
- 698 47. L. van der Maaten, Accelerating t-SNE using Tree-Based Algorithms. *J. Mach. Learn. Res.*  
699 **15**, 3221–3245 (2014).
- 700 48. Y. Hao, S. Hao, E. Andersen-Nissen, W. M. Mauck, S. Zheng, A. Butler, M. J. Lee, A. J.  
701 Wilk, C. Darby, M. Zager, P. Hoffman, M. Stoeckius, E. Papalexi, E. P. Mimitou, J. Jain, A.  
702 Srivastava, T. Stuart, L. M. Fleming, B. Yeung, A. J. Rogers, J. M. McElrath, C. A. Blish,  
703 R. Gottardo, P. Smibert, R. Satija, Integrated analysis of multimodal single-cell data. *Cell*.  
704 **184**, 3573–3587.e29 (2021).
- 705 49. K. Blighe, S. Rana, M. Lewis, EnhancedVolcano: Publication-ready volcano plots with  
706 enhanced colouring and labeling. (2018).
- 707 50. M. I. Love, W. Huber, S. Anders, Moderated estimation of fold change and dispersion for  
708 RNA-seq data with DESeq2. *Genome Biol.* **15**, 550 (2014).
- 709 51. M. D. Young, M. J. Wakefield, G. K. Smyth, A. Oshlack, Gene ontology analysis for RNA-  
710 seq: accounting for selection bias. *Genome Biol.* **11**, R14 (2010).
- 711 52. G. Yu, L.-G. Wang, Y. Han, Q.-Y. He, clusterProfiler: an R Package for Comparing  
712 Biological Themes Among Gene Clusters. *Omi. A J. Integr. Biol.* **16**, 284–287 (2012).
- 713 53. M. Ashburner, C. A. Ball, J. A. Blake, D. Botstein, H. Butler, J. M. Cherry, A. P. Davis, K.  
714 Dolinski, S. S. Dwight, J. T. Eppig, M. A. Harris, D. P. Hill, L. Issel-Tarver, A. Kasarskis,  
715 S. Lewis, J. C. Matese, J. E. Richardson, M. Ringwald, G. M. Rubin, G. Sherlock, Gene  
716 Ontology: tool for the unification of biology. *Nat. Genet.* **25**, 25–29 (2000).
- 717 54. M. Kanehisa, S. Goto, M. Furumichi, M. Tanabe, M. Hirakawa, KEGG for representation  
718 and analysis of molecular networks involving diseases and drugs. *Nucleic Acids Res.* **38**,  
719 D355–D360 (2010).
- 720 55. H. Wickham, *ggplot2: Elegant Graphics for Data Analysis* (Springer-Verlag New York,  
721 2016).
- 722 56. D. Merico, R. Isserlin, O. Stueker, A. Emili, G. D. Bader, Enrichment Map: A Network-  
723 Based Method for Gene-Set Enrichment Visualization and Interpretation. *PLoS One.* **5**,  
724 e13984 (2010).
- 725 57. T. Kawamoto, Use of a new adhesive film for the preparation of multi-purpose fresh-frozen

- 726 sections from hard tissues, whole-animals, insects and plants. *Arch. Histol. Cytol.* **66**, 123–  
727 143 (2003).
- 728 58. M. Uhlen, C. Zhang, S. Lee, E. Sjöstedt, L. Fagerberg, G. Bidkhor, R. Benfeitas, M. Arif,  
729 Z. Liu, F. Edfors, K. Sanli, K. von Feilitzen, P. Oksvold, E. Lundberg, S. Hober, P. Nilsson,  
730 J. Mattsson, J. M. Schwenk, H. Brunnström, B. Glimelius, T. Sjöblom, P.-H. Edqvist, D.  
731 Djureinovic, P. Micke, C. Lindskog, A. Mardinoglu, F. Ponten, A pathology atlas of the  
732 human cancer transcriptome. *Science* (80-. ). **357**, eaan2507 (2017).
- 733 59. Cortazar, A. R. *et al.* CANCERTOOL: A Visualization and Representation Interface to  
734 Exploit Cancer Datasets. *Cancer Res.* **78**, 6320–6328 (2018).
- 735 60. Chen, F., Chandrashekar, D. S., Varambally, S. & Creighton, C. J. Pan-cancer molecular  
736 subtypes revealed by mass-spectrometry-based proteomic characterization of more than 500  
737 human cancers. *Nat. Commun.* **10**, 5679 (2019).
- 738 61. Chandrashekar, D. S. *et al.* UALCAN: An update to the integrated cancer data analysis  
739 platform. *Neoplasia* **25**, 18–27 (2022).
- 740 62. Chandrashekar, D. S. *et al.* UALCAN: A Portal for Facilitating Tumor Subgroup Gene  
741 Expression and Survival Analyses. *Neoplasia* **19**, 649–658 (2017).
- 742 63. Lániczky, A. & Györffy, B. Web-Based Survival Analysis Tool Tailored for Medical  
743 Research (KMplot): Development and Implementation. *J. Med. Internet Res.* **23**, e27633  
744 (2021).
- 745 64. Györffy, B. Survival analysis across the entire transcriptome identifies biomarkers with the  
746 highest prognostic power in breast cancer. *Comput. Struct. Biotechnol. J.* **19**, 4101–4109  
747 (2021).
- 748  
749

## 750 Acknowledgments

751 This work was funded by the Deutsche Forschungsgemeinschaft (DFG) Emmy Noether grant (CI  
752 203/2-1 to A. C., S. B, D.S. G, and S. A. E. Y.). A. C. also thanks the funding from IKERBASQUE  
753 Basque Foundation for Science and from the Spanish Ministry of Science and Innovation  
754 (PID2021-123013OB-I00). H. M. T. thanks the International Max Planck Research School  
755 (IMPRS) on Multiscale Bio Systems for financial support. J.C. and M.G thank the support provided  
756 by the Helmholtz Association through program-oriented funding and by the Federal Ministry of  
757 Education and Research, Germany, as part of the program Health Research (BCRT; Grant No.  
758 13GW0098). This work was funded by the Bavarian ministry of economic affairs, energy and  
759 technology (“Aufbau einer Infrastruktur und Logistik zur translationalen Forschung mit Geweben  
760 von Krebspatienten”, AZ 20-3410.1-1-1). The authors thank the technicians of the Research  
761 Workshop at the Charité-Universitätsmedizin Berlin for developing and manufacturing some  
762 experimental devices. We thank the lab of Dr. Joan Massagué at the Memorial Sloan Kettering  
763 Cancer Center, USA, for providing the MDA-MB-231-1883 BoM cells. We thank Aline Lueckgen,  
764 Christine Pilz, Inés Moreno-Jiménez, Geonho Song, Tina Seeman, Nicky Tam, Reynel Urrea  
765 Castellanos, Stefanie Güldener and Reinhild Dünnebacke for technical assistance with hydrogel  
766 preparation, cell culture, immunostaining, rheology, confocal microscopy, immunoblotting, blot  
767 imaging, RNA sequencing and microplate-reader measurements, respectively. The authors would  
768 like to acknowledge Peter Fratzl, Maria M. Caffarel and Andrea Abaurrea for scientific discussion.  
769

770 **Competing interests:** CAK is member of the SAB of HiberCell.

771



772 **Figures**

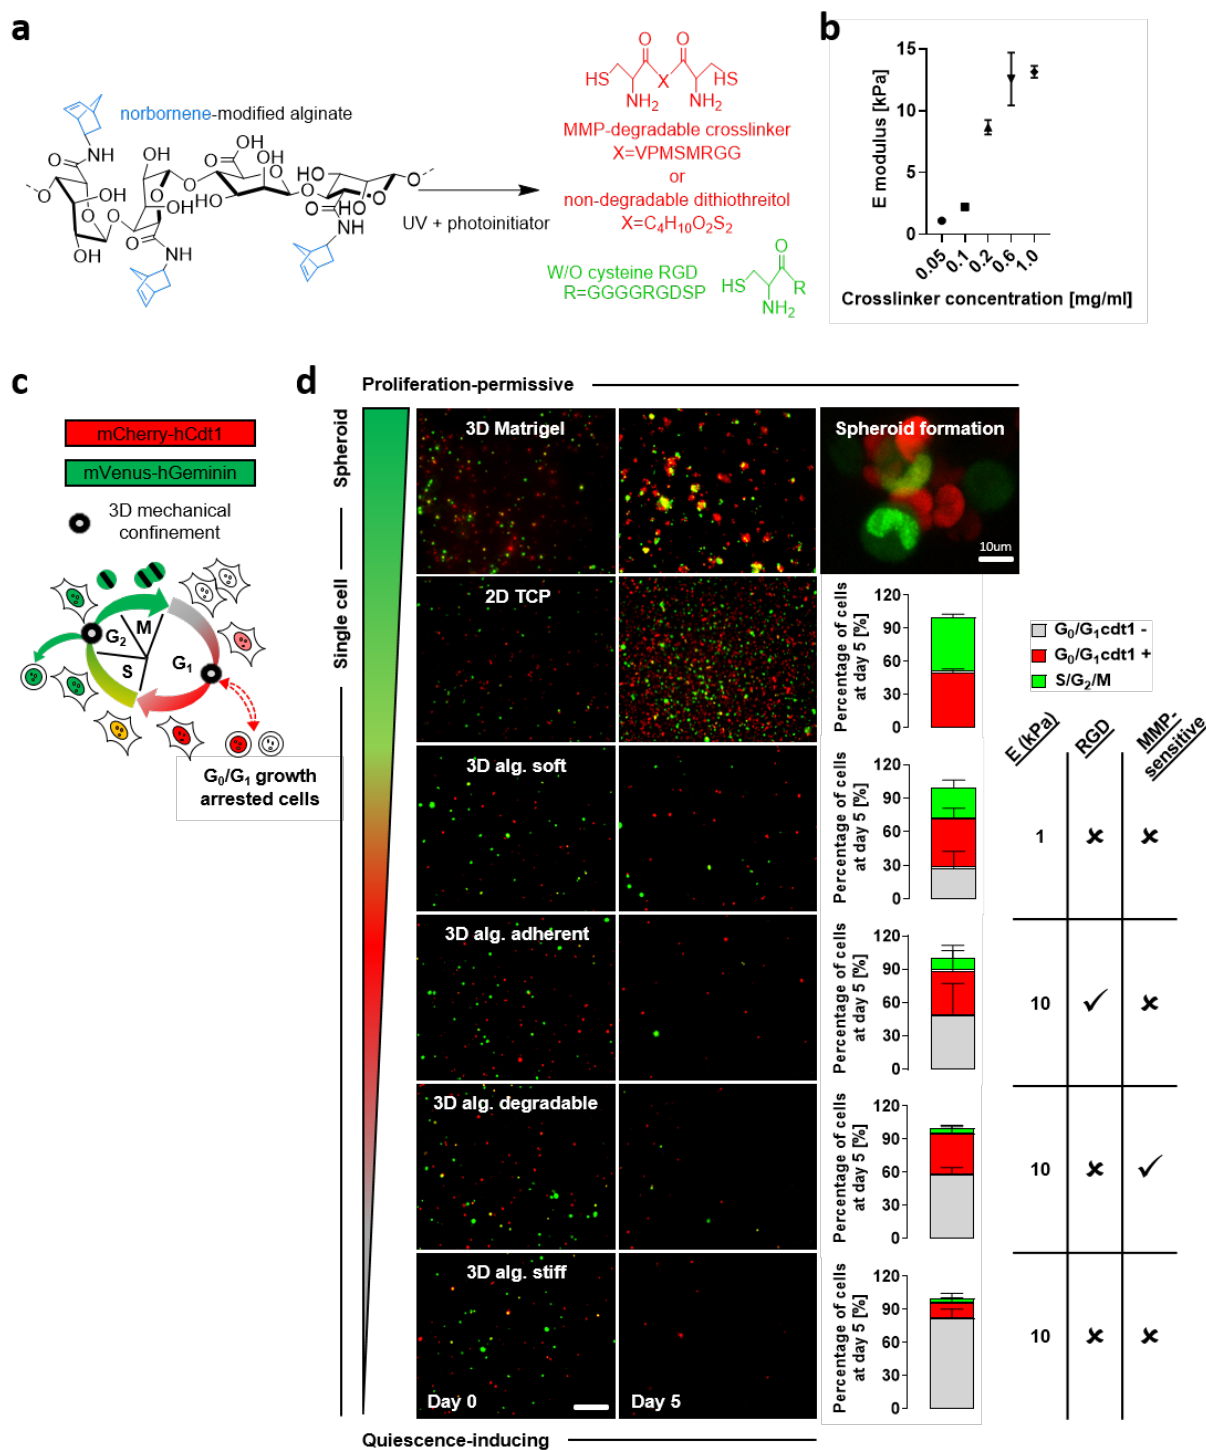

773

774

775

776

777

778

779

780

**Fig. 1 3D mechanical confinement via covalently-crosslinked alginate yields distinct fractions and populations of growth-arrested cells based on hydrogel composition. a)** Bis-cysteine enzymatically (MMP) degradable peptide or non-degradable dithiothreitol (DTT) (red) crosslink with norbornene-modified alginate (blue) in the presence or absence of cysteine-coupled RGD molecules (green). **b)** Frequency sweep of norbornene-modified alginate (no RGD) with different concentrations of DTT crosslinker yields a range of stiffness (Elastic/Young's moduli) (n=3). **c)** Diagram of FUCCI2 cell cycle reporter activity

781 (G<sub>0</sub>/G<sub>1</sub>=mCherry-hCdt1 and S/G<sub>2</sub>/M=mVenus-hGeminin). The cartoon was adapted from  
782 Sakaue-Sawano et al.<sup>15</sup>, Copyright (2008), with permission from Elsevier. **d)** Time lapse  
783 imaging (5 days) of MDA-FUCCI2 cells within a range of proliferation-permissive and  
784 quiescence-inducing hydrogels with distinct stiffness, adhesion and degradation properties  
785 (right-hand side table). Representative time lapse fluorescence maximum projections at day  
786 0 and day 5, scale bar equals 200 μm. Scale bar equals 10 μm for 3D Matrigel spheroid  
787 image. Percentage bar plots show fraction of cell cycle distribution at day 5 for different  
788 experimental groups. Error bars indicate mean and standard deviation (n≥3 gels for 82 to  
789 453 cells).

790  
791  
792  
793  
794  
795  
796  
797  
798  
799  
800  
801  
802  
803  
804  
805  
806  
807  
808  
809  
810  
811

812

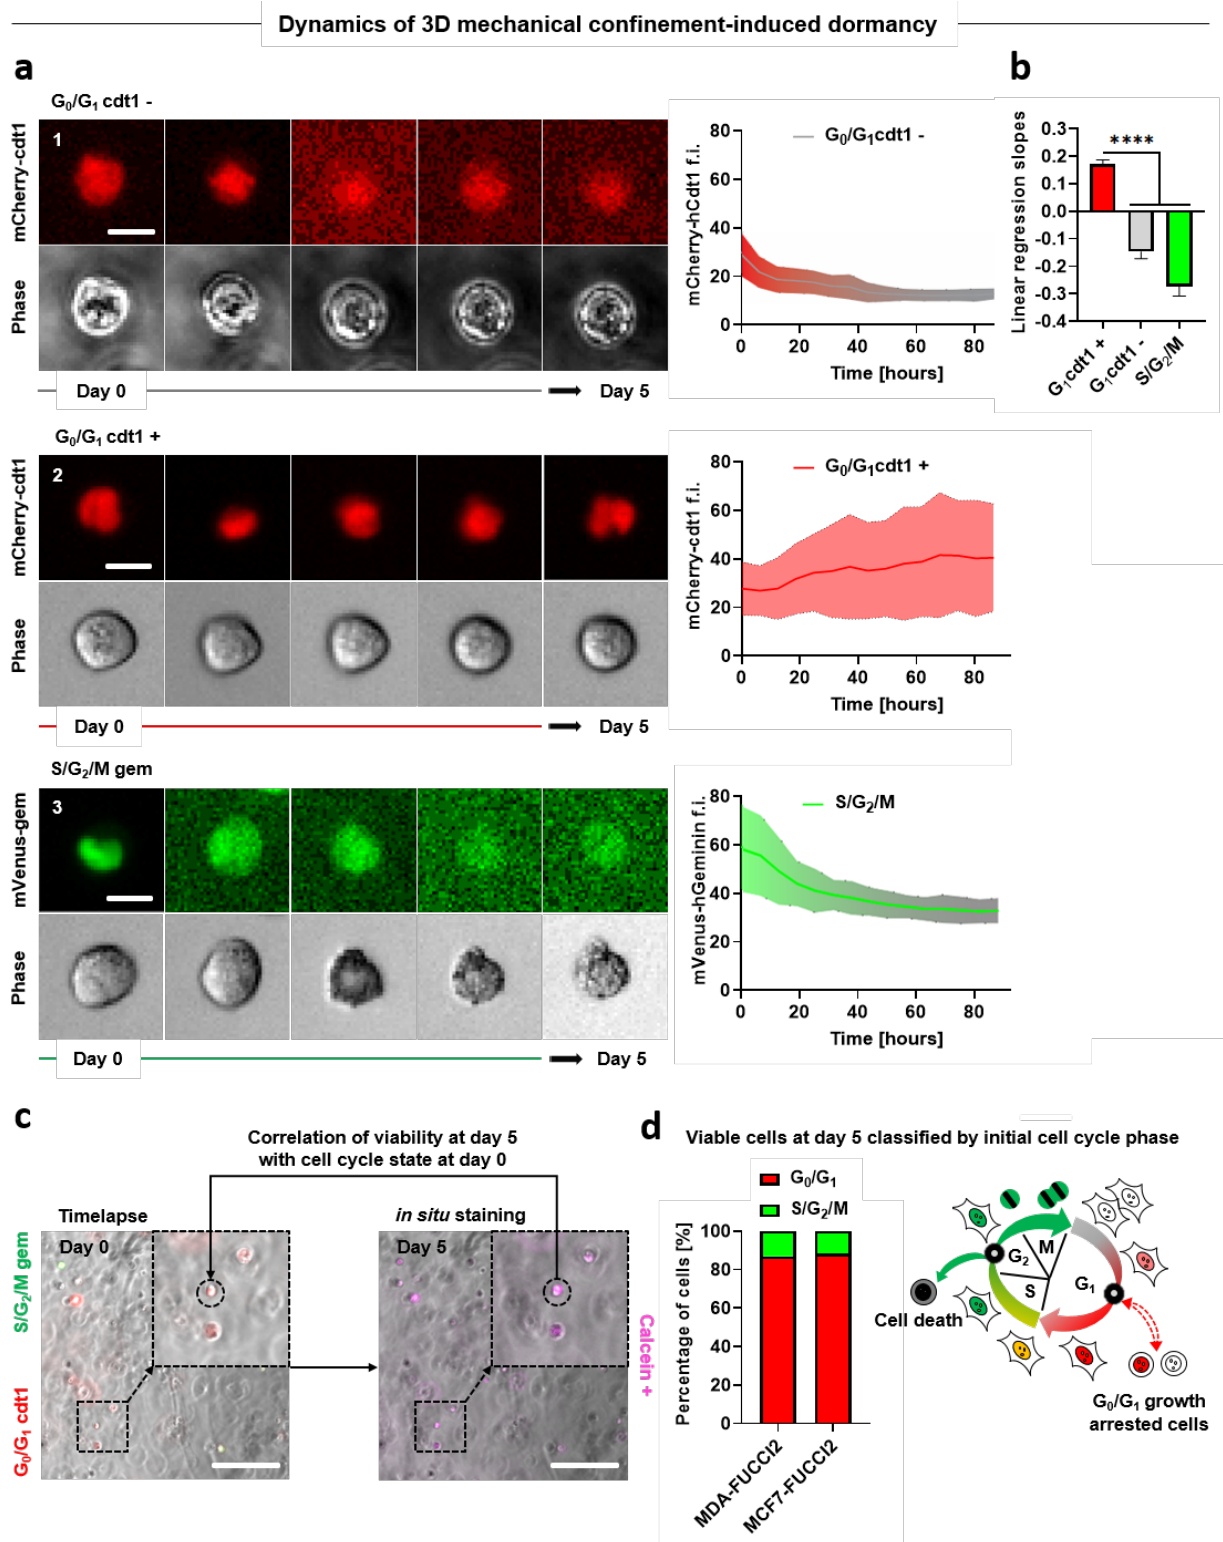

813

814

815

816

817

818

**Fig. 2 Dynamics of cell cycle and viability correlation reveal that G<sub>0</sub>/G<sub>1</sub> cells are substantially more resistant to 3D mechanical confinement than cells in the S/G<sub>2</sub>/M phase. a)** Representative time lapse images of single MDA-FUCCI2 cells in 3D alginate stiff hydrogels with respective single cell longitudinal tracking of mCherry-hCdt1 and mVenus-hGeminin fluorescence intensity (f.i.). Center trace and shaded area indicate mean and standard deviation (n≥15 cells). Scale bar equals 10 μm. **b)** Comparison of linear

819 regression slopes from f.i. tracking graph. Kruskal–Wallis test with Dunn’s correction  
820 \*\*\*\* $p < 0.0001$ . **c**) Experimental workflow for longitudinal correlation of FUCCI2 initial  
821 cell cycle state within 3D alginate stiff hydrogels and viability after 5 days of encapsulation.  
822 Cells were stained *in situ* for viability after 5 days time lapse and the selected cells (calcein+)  
823 were tracked back to their initial cell cycle state (time of encapsulation). Scale bar equals  
824 200  $\mu\text{m}$ . **d**) Percentage bar plots show fraction of viable cells with respect to their initial cell  
825 cycle state for MDA-FUCCI2 and MCF7-FUCCI2 cells ( $n \geq 241$  cells pooled from 3  
826 independent experiments). Diagram of cell cycle progression under 3D mechanical  
827 confinement, revealing growth arrest and higher resilience for cells in  $G_0/G_1$  and death for  
828 cells in S/ $G_2$ /M. The cartoon was adapted from Sakaue-Sawano et al.<sup>15</sup>, Copyright (2008),  
829 with permission from Elsevier.

830  
831  
832  
833  
834  
835  
836  
837  
838  
839  
840  
841  
842  
843  
844  
845  
846  
847  
848



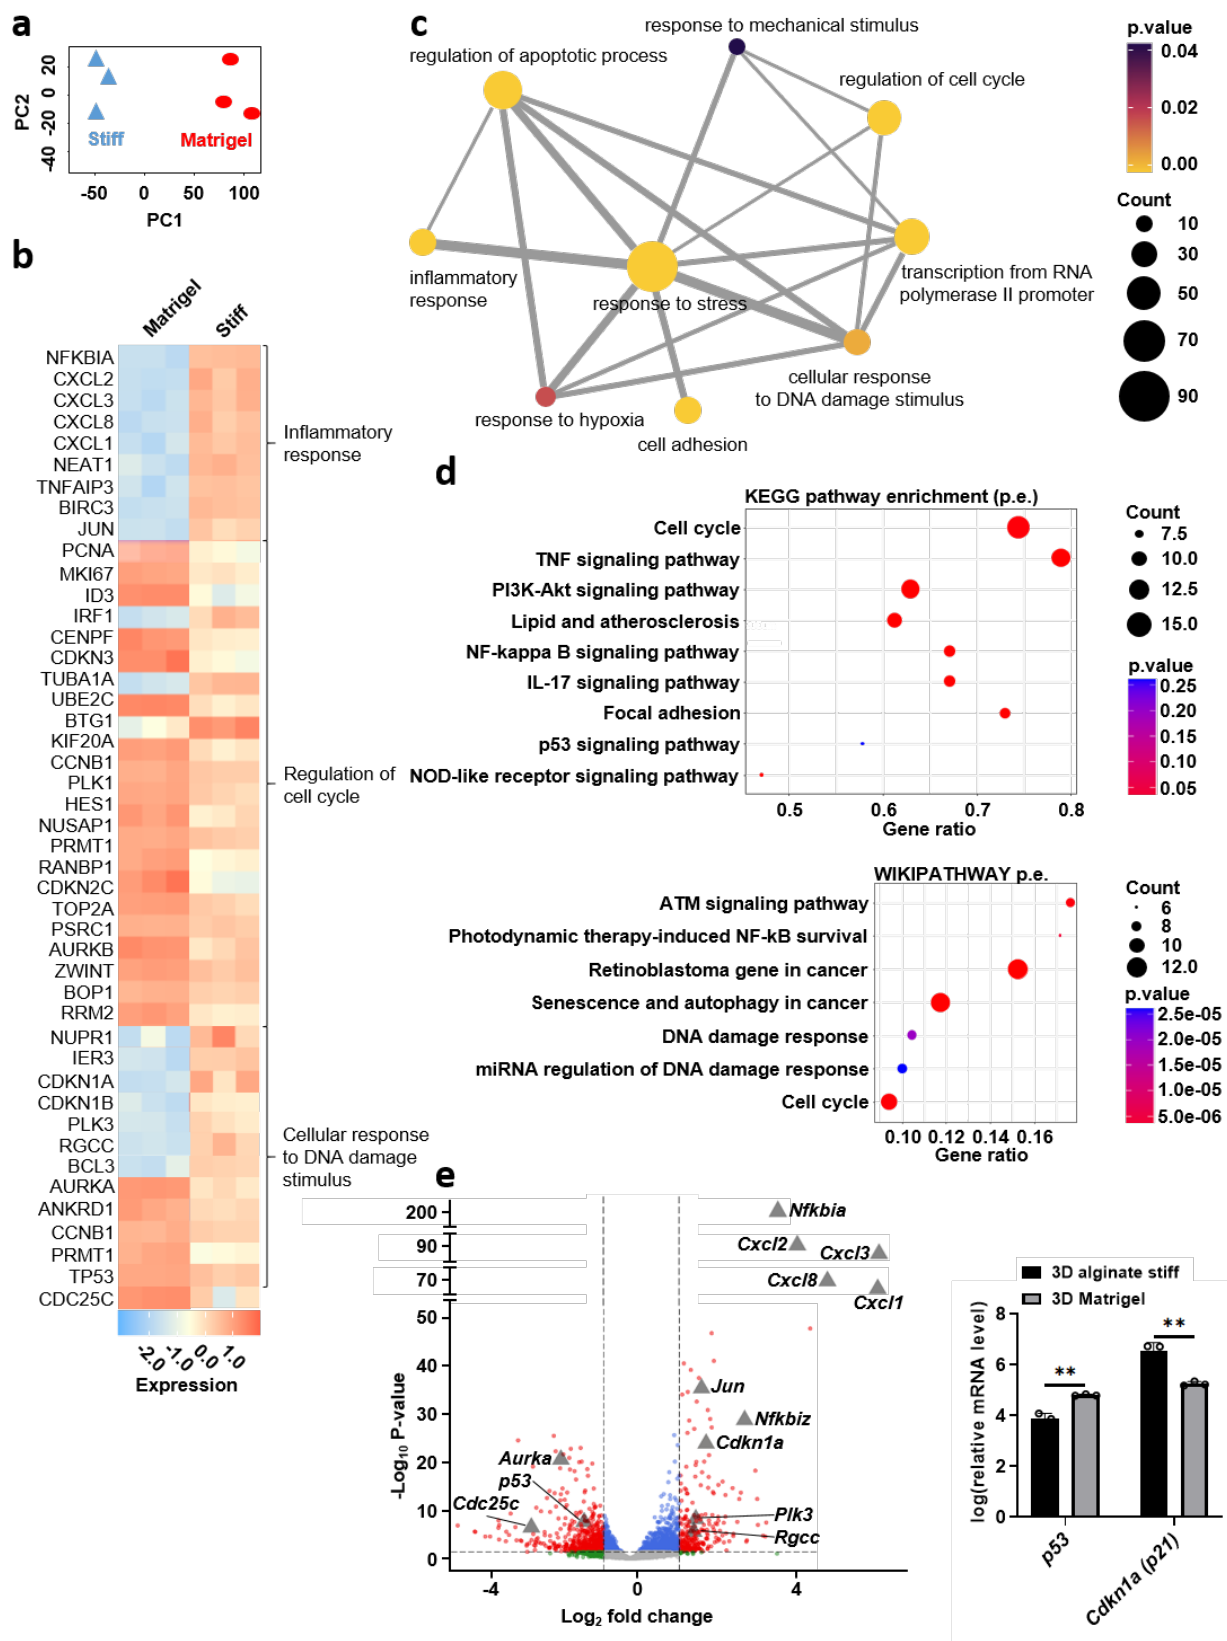

**Fig. 3 Gene expression analysis of cells in 3D alginate stiff compared to 3D Matrigel.**  
**a)** Principal-component analysis (PCA) based on all expressed genes between 3D alginate stiff and 3D Matrigel groups acquired from RNA sequencing (n=3 for each condition).

853 **b)** Heat map of selected differentially expressed genes involved in inflammatory response,  
854 regulation of cell cycle and cellular response to DNA damage stimulus. **c)** Network map of  
855 selected biological processes most enriched in 3D alginate compared to 3D Matrigel. Node  
856 size, node color and edge width represent number of genes, *p*-value from enrichment  
857 analysis and overlap of number of genes between two gene sets, respectively. **d)** Selected  
858 top differentially regulated pathways from Gene-set-enrichment analysis (GSEA) on  
859 differentially expressed genes between cells grown in 3D alginate stiff and 3D Matrigel  
860 according to KEGG and WIKIPATHWAY databases. **e)** Volcano plot of differentially  
861 expressed genes between 3D alginate stiff and 3D Matrigel. Grey triangles mark genes of  
862 interest associated with inflammation and DNA-damage pathways (grey dots=not  
863 significant, green dots= significant absolute log(base2) fold change of > 1, blue dots=  
864 significant *p*-value of < 0.05, red=significant absolute log(base2) fold change of > 1 and *p*-  
865 value <0.05 from a total of 9426 entries). Relative mRNA levels of p53 and cdkn1a (p21)  
866 (n=3 for each condition). Student's *t*-test \*\**p*≤0.01. Error bars indicate mean and standard  
867 deviation.

868

869

870

871

872

873

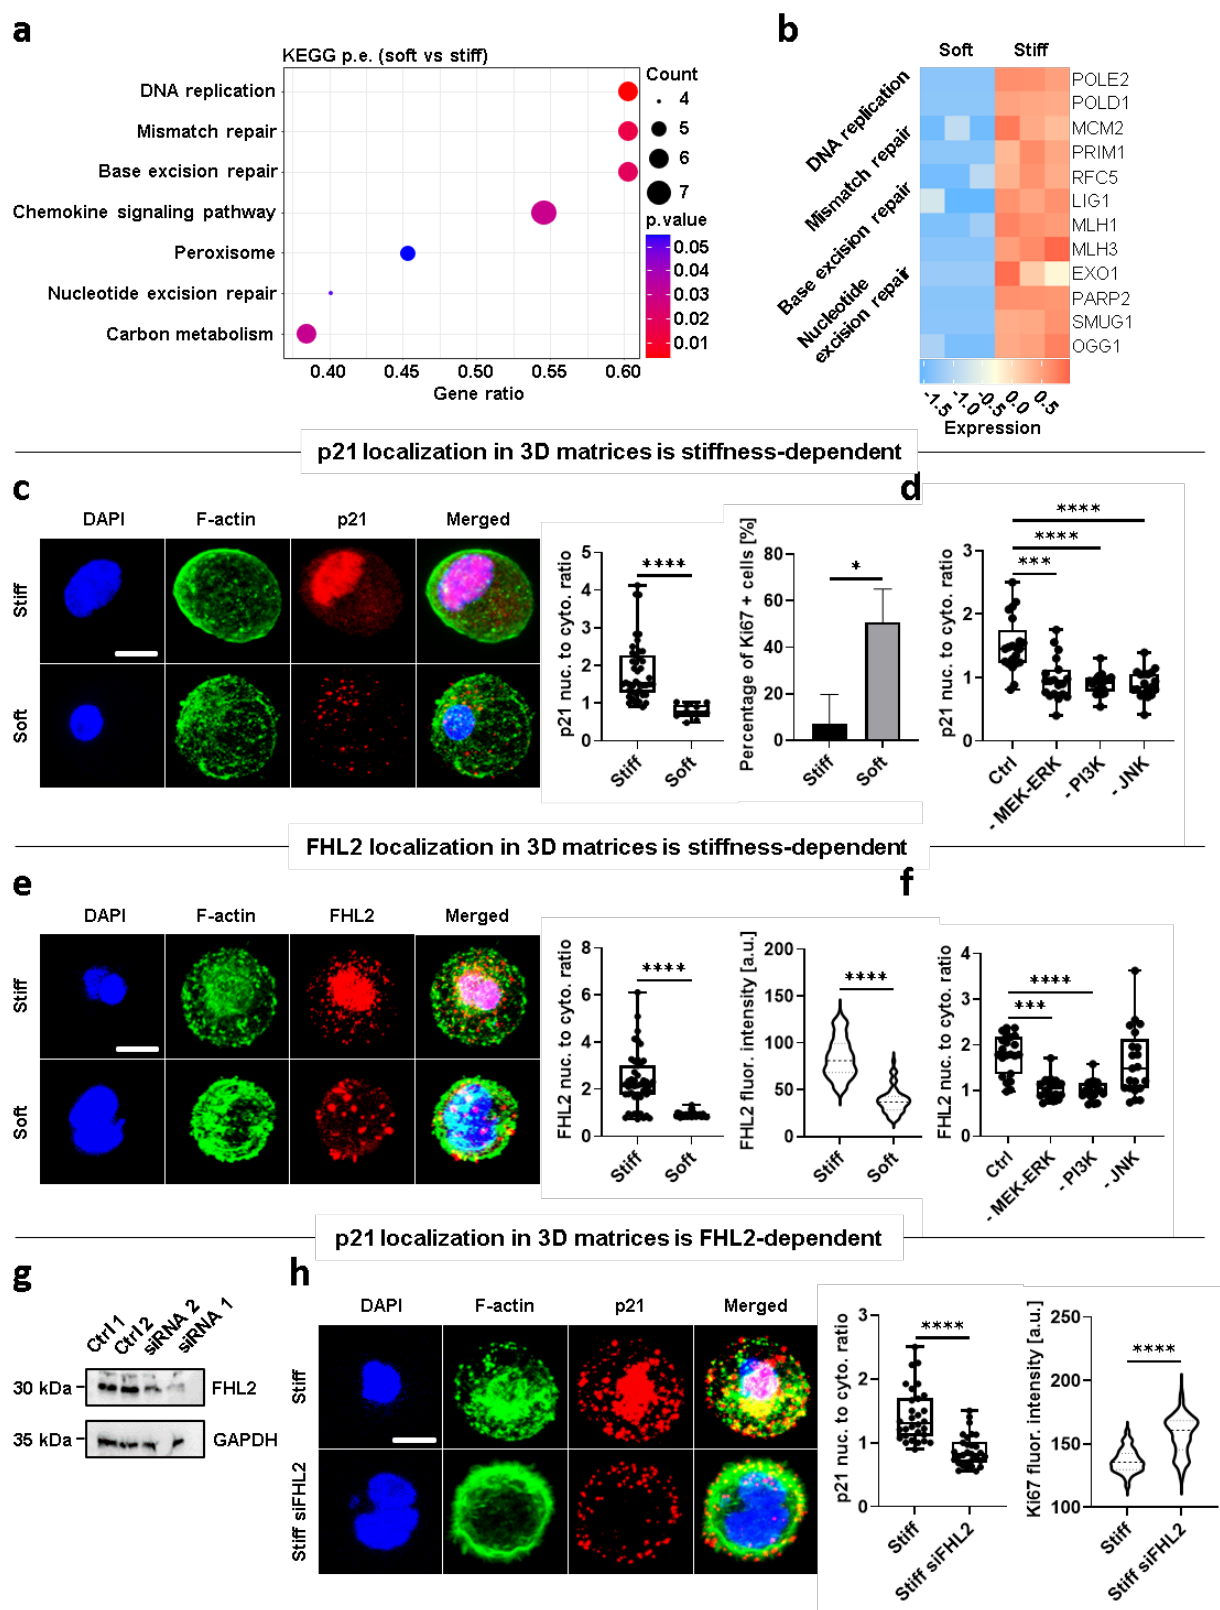

**Fig. 4 p21 and FHL2 localization in 3D matrices is stiffness-dependent and FHL2 mediates p21 localization and Ki67 expression.** a) Selected top differentially regulated pathways from GSEA based on differentially expressed genes between cells grown in soft vs. stiff alginate hydrogels. b) Heat map of differentially expressed genes (soft vs. stiff)

879 from DNA damage and repair pathways. **c)** Representative confocal images of p21  
880 localization and quantification of its nuclear-to-cytoplasmic ratio (n=3 gels for 10 to 42  
881 cells) for MDA231 cells within 3D stiff and soft alginate hydrogels after 7 days of  
882 encapsulation (blue=DAPI, green=F-Actin, red=p21). Scale bar equals 10  $\mu$ m, Mann-  
883 Whitney *U*-test \*\*\*\*p<0.0001. Fraction of Ki67-positive cells (n=3 gels for 28 to 628 cells),  
884 student's *t*-test \*p<0.05. **d)** Quantification of p21 localization in 3D alginate stiff hydrogels  
885 after 7 days in the presence or absence of indicated inhibitors (n $\geq$ 19 cells). Student's *t*-test  
886 with respect to control group (3D alginate stiff) \*\*\*p<0.001 and \*\*\*\*p<0.0001.  
887 **e)** Representative confocal images of FHL2 localization and quantification of its nuclear-  
888 to-cytoplasmic ratio (n=3 gels for 36 to 46 cells) for MDA231 cells within 3D stiff and soft  
889 alginate hydrogels after 7 days of encapsulation (blue=DAPI, green=F-Actin, red=FHL2).  
890 Scale bar equals 10  $\mu$ m, Mann-Whitney *U*-test \*\*\*\*p<0.0001. FHL2 fluorescence intensity  
891 (f.i.) per cell (n=3 gels for 59 to 151 cells) Mann-Whitney *U*-test \*\*\*\*p<0.0001. **f)**  
892 Quantification of FHL2 localization in 3D alginate stiff hydrogels after 7 days in the  
893 presence or absence of indicated inhibitors (n $\geq$ 18 cells). Student's *t*-test with respect to  
894 control group (3D alginate stiff) \*\*\*p<0.001 and \*\*\*\*p<0.0001. **g)** Immunoblot showing  
895 FHL2 levels in MDA231 cells treated with two different anti-FHL2 siRNA oligos compared  
896 to untreated (control 1) or scramble (control 2) groups. GAPDH, glyceraldehyde-3-  
897 phosphate de-hydrogenase. **h)** Representative confocal images of p21 localization and  
898 quantification of its nuclear-to-cytoplasmic ratio (n=3 gels for 30 cells) for MDA231 normal  
899 and siRNA-FHL2 silenced cells within 3D stiff alginate hydrogels (blue=DAPI, green=F-  
900 Actin, red=p21). Scale bar equals 10  $\mu$ m, Mann-Whitney *U*-test \*\*\*\*p<0.0001. Ki67 f.i.  
901 per cell (n= 74 to 260 cells), Mann-Whitney *U*-test \*\*\*\*p<0.0001. Datasets shown as box  
902 plots with median for 25<sup>th</sup> to 75<sup>th</sup> percentiles and whiskers for minimum and maximum.  
903 Violin plots show dashed lines for median and dotted lines for the two quartile lines. Error  
904 bars indicate mean and standard deviation.

905

906

907



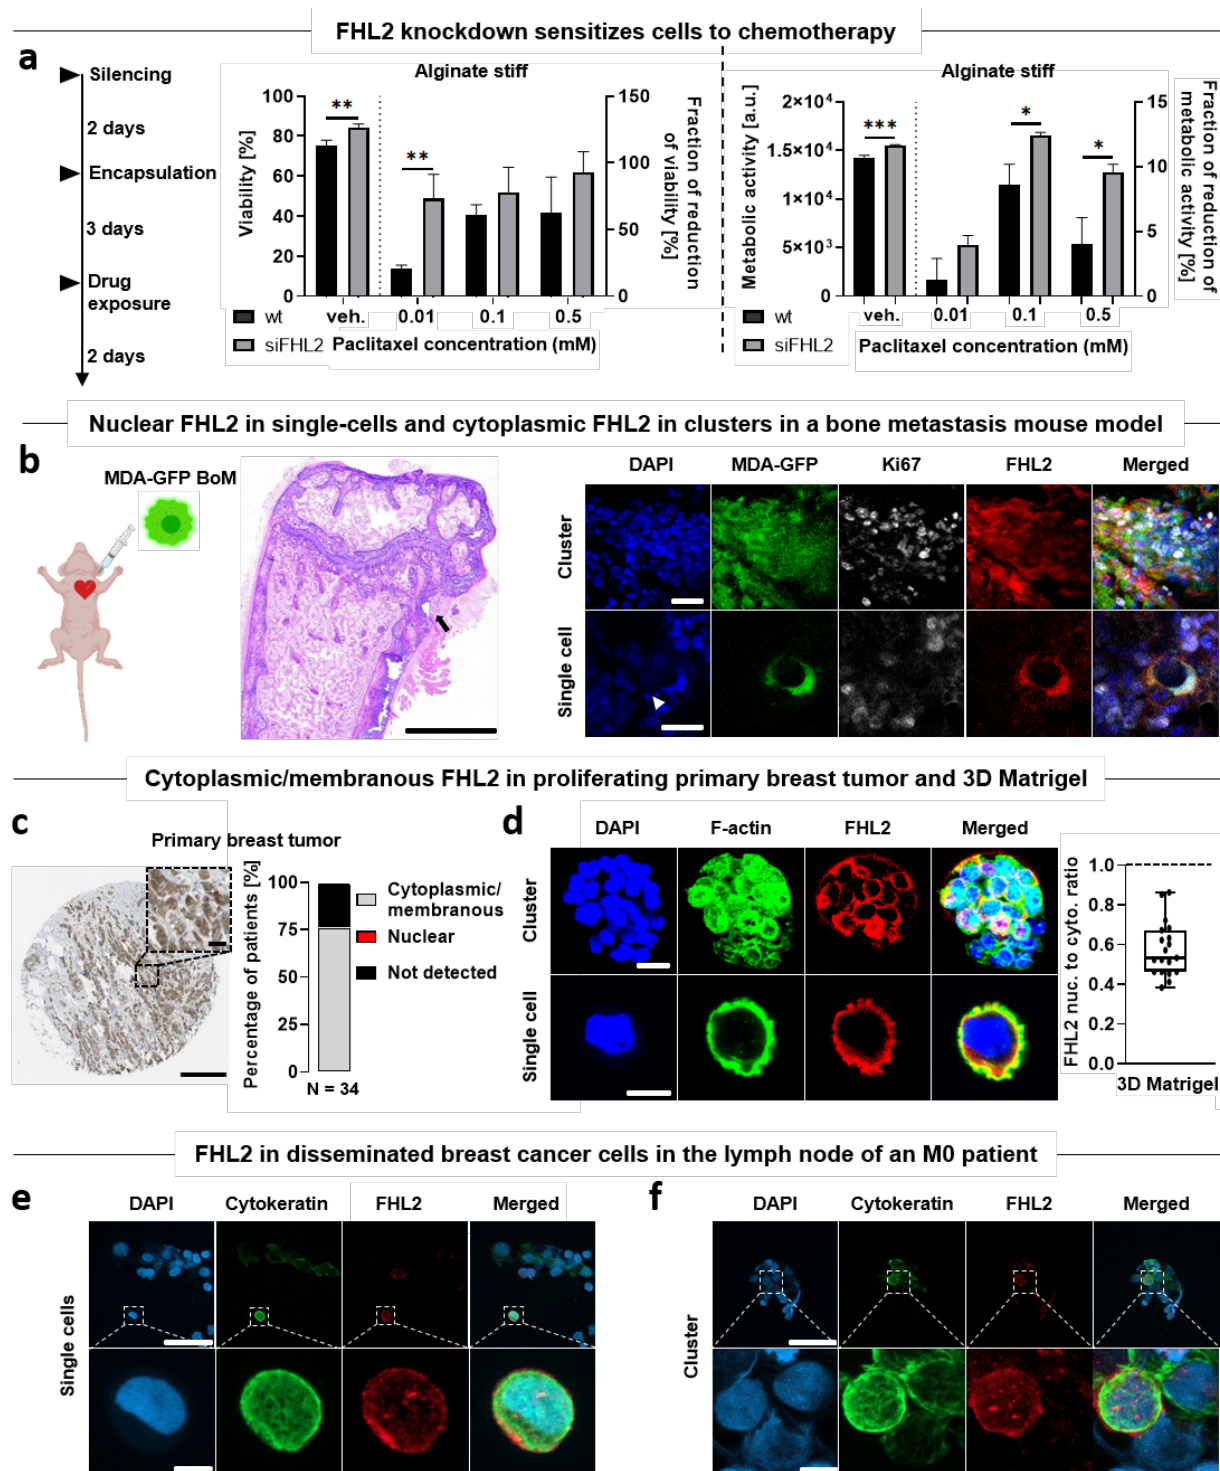

**Fig. 5 FHL2 knockdown sensitizes cells to chemotherapy. FHL2 expression and localization in murine tissue of a breast cancer bone metastasis model, in human primary breast tumor and in early DCCs of an M0 patient. a)** FHL2-silenced MDA231 cells were encapsulated for 3 days and exposed to Paclitaxel (0.01 to 0.5 mM) for 2 days, after which viability and metabolic activity (Presto Blue) measurements of normal and siRNA-FHL2 silenced cells within 3D alginate stiff were performed. Left y-axis corresponds to the overall viability and metabolic activity of vehicle (untreated groups). Right y-axis shows the fraction of reduction of viability and metabolic activity of drug treated groups with respect to the untreated group. Student's *t*-test (n=3 hydrogels) \**p*<0.05,

919 \*\* $p \leq 0.01$ , \*\*\* $p \leq 0.001$ , \*\*\*\* $p \leq 0.0001$ . Error bars indicate mean and standard deviation.  
920 **b)** Intracardiac injection of GFP-tagged MDA-MB-231-1883 BoM cells in mice with  
921 representative Hematoxylin and Eosin (H&E) staining of the femur showing an osteolytic  
922 lesion (arrowhead). Representative confocal images of Ki67 (proliferation) and FHL2  
923 localization of GFP-tagged MDA-MB-231-1883 BoM cells as single cells and clusters.  
924 Scale bars equal 1000  $\mu\text{m}$ , 25  $\mu\text{m}$  and 20  $\mu\text{m}$  for H&E overview, cluster and single cell  
925 images, respectively. **c)** Representative immunohistochemical image of FHL2 localization  
926 in a female patient (50 years old) with breast ductal carcinoma. Fraction of FHL2  
927 localization in 34 patients with primary breast ductal carcinoma. Data obtained from The  
928 Human Protein Atlas<sup>58</sup>. Scale bar equals 20  $\mu\text{m}$ . **d)** Representative confocal images of FHL2  
929 localization in spheroids and single MDA231 cells within 3D Matrigel after 7 days of  
930 encapsulation and quantification of its nuclear-to-cytoplasmic ratio (n=19 cells)  
931 (blue=DAPI, green=F-Actin, red=FHL2). Scale bar equals 20  $\mu\text{m}$  for spheroid image and  
932 10  $\mu\text{m}$  for single cell image. **e, f)** Confocal images of cytokeratin (epithelial marker) and  
933 FHL2 (in single cells and within clusters) of human breast cancer cells disseminated in the  
934 sentinel lymph node of an M0 patient. Scale bars equal 50  $\mu\text{m}$  and 5  $\mu\text{m}$  for the wide and  
935 zoomed images, respectively.

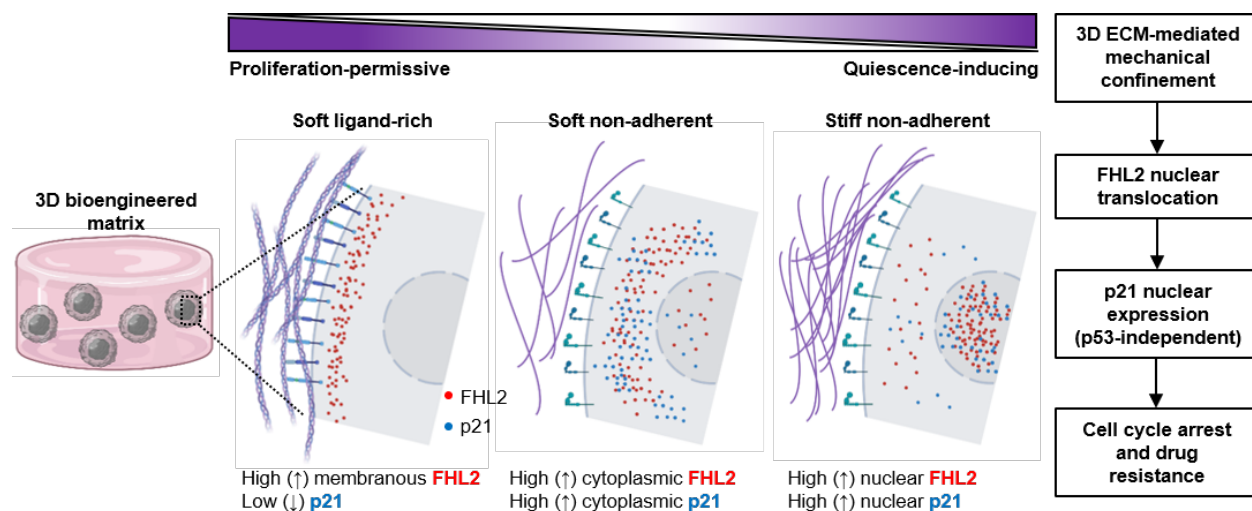

**Fig. 6 Proposed stiffness-mediated FHL2 signaling mechanism in 3D bioengineered matrices inducing cancer cell quiescence and drug resistance.** In proliferation-permissive, ligand-rich microenvironments such as basement membranes, stronger adhesion sites maintain FHL2 in the membranous regions. In low or non-adherent microenvironments, the increase in mechanical confinement (stiffness) results in FHL2 translocation to the nucleus, leading to high p21 nuclear expression and cell cycle arrest (graphical illustration created with BioRender.com).
